# Supplementary material
Source: MDPI journal article supplement (https://www.mdpi.com/2075-163X/9/12/780)
Supplement: s1 [file s1]

## Sheet: TABLE S1
(a)	ppm			232Th/238U	Corrected isotope ratios									Corrected ages (Ma)
	Pbtot	232Th	238U		207Pb/206Pb	1s	207Pb/235U	1s	206Pb/238U	1s	rho	208Pb/232Th	1s	207Pb/206Pb	1s	207Pb/235U	1s	206Pb/238U	1s	208Pb/232Th	1s
CZ22-02	184.469	115.964	341.644	0.33943	0.159422	0.00236613	9.67098	0.163539	0.438389	0.00422064	0.569334	0.121648	0.00179577	2449.69	25.77	2403.95	15.647	2343.42	18.9579	2320.35	32.3599
CZ22-03	161.219	111.775	274.726	0.40686	0.160799	0.00216843	10.5525	0.151174	0.474571	0.00350517	0.515571	0.129854	0.00179418	2463.89	22.07	2484.55	13.394	2503.58	15.3831	2467.68	32.0966
CZ22-06	190.554	149.953	314.79	0.476359	0.161342	0.00217425	10.7628	0.150636	0.482789	0.00353396	0.522998	0.133585	0.00183804	2470.05	22.84	2502.86	13.1141	2539.4	15.425	2534.31	32.7729
CZ22-08	92.5121	60.0051	156.014	0.384613	0.161387	0.00252358	10.8344	0.176561	0.486132	0.00407472	0.514342	0.132048	0.00222931	2470.05	27.3175	2509.02	15.2446	2553.92	17.7287	2506.89	39.8034
CZ22-09	214.856	138.213	368.648	0.374919	0.161301	0.00220895	10.6223	0.155524	0.476559	0.00344804	0.49417	0.13305	0.00193565	2469.43	23.15	2490.66	13.6925	2512.26	15.1146	2524.77	34.5296
CZ22-10	92.9939	53.3901	162.182	0.329198	0.159183	0.00216885	10.4259	0.149794	0.474216	0.00338154	0.496316	0.13175	0.00195071	2447.22	23.145	2473.36	13.4175	2502.02	14.8483	2501.56	34.8382
CZ22-12	162.608	95.806	277.601	0.345122	0.160323	0.00197388	10.6582	0.142436	0.481382	0.00339838	0.52826	0.135319	0.00182789	2458.94	20.985	2493.79	12.5209	2533.28	14.8516	2565.2	32.5421
CZ22-13	101.531	79.3263	170.466	0.465349	0.160436	0.00211554	10.5542	0.150482	0.476388	0.00339969	0.500519	0.134098	0.00187405	2461.11	22.2225	2484.69	13.3318	2511.51	14.906	2543.45	33.3999
CZ22-14	121.182	93.0278	204.668	0.45453	0.159914	0.00220649	10.4976	0.161583	0.475377	0.00389932	0.532898	0.134814	0.00196713	2454.62	24.2275	2479.7	14.3691	2507.1	17.0911	2556.22	35.0366
CZ22-15	172.439	133.8	287.167	0.465933	0.159484	0.00231418	10.5959	0.170401	0.481116	0.00393943	0.509153	0.135388	0.00197541	2450.3	25.155	2488.35	15.0167	2532.13	17.2004	2566.43	35.1663
CZ22-18	134.136	120.308	233.789	0.514602	0.152783	0.00189513	9.57434	0.131196	0.454093	0.00332637	0.534582	0.131469	0.00190478	2377.47	15.895	2394.71	12.7027	2413.43	14.8042	2496.54	34.0264
CZ22-20	92.1456	102.269	153.265	0.667266	0.1564	0.00216036	9.85938	0.148347	0.456879	0.00337679	0.491218	0.131259	0.00186136	2416.97	22.9925	2421.72	13.9683	2425.76	14.999	2492.8	33.2569
CZ22-21	167.179	99.5016	289.357	0.343871	0.15763	0.00231223	10.2726	0.165053	0.472122	0.00340186	0.448458	0.127129	0.00199713	2431.48	24.9975	2459.64	14.9609	2492.86	14.9574	2418.87	35.8135
CZ22-22	120.647	65.3291	211.701	0.308591	0.158107	0.00233404	10.2814	0.163779	0.471333	0.0036164	0.481663	0.128097	0.00221052	2435.49	24.9975	2460.43	14.8356	2489.4	15.9016	2436.22	39.606
CZ22-23	81.082	88.0334	132.203	0.665895	0.158608	0.00221122	10.2479	0.153721	0.468312	0.00360701	0.513466	0.127649	0.00196349	2442.59	23.765	2457.41	13.9772	2476.16	15.8924	2428.19	35.194
CZ22-25	138.31	154.303	222.163	0.694545	0.164665	0.00209743	10.6643	0.143113	0.468981	0.00289415	0.459855	0.130095	0.00170872	2505.55	21.6025	2494.32	12.5729	2479.09	12.7709	2471.98	30.5611
CZ22-27	139.376	125.52	228.949	0.548245	0.164558	0.0024918	10.8031	0.167511	0.475338	0.00320613	0.434994	0.131493	0.00191922	2502.78	25.3125	2506.33	14.5109	2506.93	14.0743	2496.98	34.2837
CZ22-28	60.2145	54.5283	95.7866	0.569268	0.167418	0.00283529	11.224	0.200937	0.48527	0.00412076	0.474333	0.136488	0.0022061	2531.79	28.86	2541.91	16.78	2550.18	17.938	2586	39.2351
CZ22-29	151.386	160.224	236.793	0.676642	0.16723	0.00260984	11.1743	0.175123	0.483836	0.00343242	0.45267	0.137023	0.00195	2531.48	31.6375	2537.78	14.7074	2543.95	14.975	2595.53	34.6641
CZ22-30	186.681	114.179	322.255	0.354314	0.163617	0.002305	10.6778	0.150779	0.47266	0.0034219	0.512696	0.135301	0.00198996	2494.45	23.7675	2495.5	13.2196	2495.21	15.0395	2564.89	35.428
CZ22-31	145.773	144.66	237.149	0.609998	0.164289	0.00220761	10.7231	0.154263	0.47218	0.00334908	0.493031	0.133344	0.00190776	2501.85	23.305	2499.42	13.469	2493.11	14.7267	2530.02	34.0232
(b)	ppm			232Th/238U	Corrected isotope ratios									Corrected ages (Ma)
	Pbtot	232Th	238U		207Pb/206Pb	1s	207Pb/235U	1s	206Pb/238U	1s	rho	208Pb/232Th	1s	207Pb/206Pb	1s	207Pb/235U	1s	206Pb/238U	1s	208Pb/232Th	1s
CZ23-01	46.4437	34.2361	83.8074	0.40851	0.161607	0.00293973	10.5857	0.199253	0.473829	0.00385822	0.432591	0.132566	0.00222393	2472.53	30.0925	2487.45	17.5446	2500.33	16.9295	2516.14	39.6892
CZ23-02	53.4603	54.125	92.5155	0.585038	0.165559	0.00270622	10.9194	0.178114	0.477606	0.00395611	0.50781	0.131977	0.00177994	2513.27	26.6975	2516.29	15.2692	2516.83	17.3129	2505.62	31.7821
CZ23-03	162.725	170.746	285.792	0.597447	0.161809	0.00221823	10.6095	0.14706	0.474036	0.0030929	0.470713	0.129356	0.00150416	2475.92	23.15	2489.54	12.973	2501.23	13.5935	2458.77	26.9202
CZ23-04	124.85	113.04	216.31	0.522584	0.161211	0.00228207	10.9444	0.158575	0.490944	0.00382018	0.537045	0.134398	0.00164968	2468.2	24.075	2518.42	13.5886	2574.76	16.5758	2548.81	29.3933
CZ23-05	37.6876	20.0759	69.1875	0.290167	0.160387	0.00265066	10.77	0.184354	0.485822	0.00472348	0.568	0.141227	0.0026607	2461.11	27.7775	2503.48	15.9948	2552.57	20.5397	2670.11	47.1236
CZ23-06	132.886	138.41	237.287	0.583302	0.162519	0.00267724	10.6929	0.188201	0.474818	0.00393919	0.471362	0.130824	0.00176491	2483.33	27.78	2496.81	16.4308	2504.65	17.2712	2485.03	31.5458
CZ23-07	58.8629	39.9547	110.623	0.361179	0.160244	0.00284757	10.4572	0.185478	0.471978	0.00436598	0.521534	0.130243	0.00208205	2458.32	29.9375	2476.13	16.5238	2492.23	19.1678	2474.63	37.2335
CZ23-08	98.5567	107.208	166.073	0.64555	0.162462	0.00251511	11.1617	0.17313	0.496543	0.00392416	0.509505	0.136599	0.00183471	2481.17	25.93	2536.72	14.5572	2598.92	16.9616	2587.98	32.6268
CZ23-09	172.21	158.959	293.807	0.541034	0.163323	0.00225879	11.2632	0.161123	0.498492	0.00423756	0.594237	0.138705	0.00176139	2490.43	17.7475	2545.16	13.4527	2607.31	18.284	2625.4	31.2649
CZ23-10	67.6284	91.8809	115.088	0.798353	0.158811	0.00235215	10.4384	0.148905	0.475331	0.00339121	0.500128	0.128462	0.00162158	2442.9	25.305	2474.46	13.325	2506.89	14.8795	2442.76	29.0445
CZ23-11	103.148	88.3263	180.183	0.490202	0.161188	0.00218212	10.9296	0.156156	0.489633	0.0035511	0.507619	0.137009	0.00181068	2468.2	17.75	2517.16	13.4009	2569.09	15.4299	2595.27	32.1878
CZ23-12	77.1678	117.946	131.124	0.899505	0.158053	0.00244973	10.1289	0.162638	0.463166	0.00393034	0.528488	0.129081	0.00160417	2434.87	25.7675	2446.61	14.9318	2453.52	17.3669	2453.85	28.717
CZ23-14	15.7021	6.63924	29.809	0.222726	0.161519	0.00341707	10.5543	0.22716	0.472509	0.00420784	0.413756	0.139397	0.00389021	2471.91	35.805	2484.7	20.0341	2494.56	18.4704	2637.67	69.0101
CZ23-15	68.5986	53.0371	119.33	0.444457	0.15954	0.00236988	10.8809	0.168207	0.492935	0.00366778	0.481319	0.143509	0.00201641	2450.92	25	2513	14.4768	2583.36	15.8986	2710.49	35.6414
CZ23-16	47.1233	58.9268	82.5727	0.713636	0.160679	0.00252026	10.3327	0.161701	0.465339	0.00367565	0.504736	0.127921	0.00188944	2462.65	31.9475	2465.03	14.5847	2463.09	16.2248	2433.07	33.8585
CZ23-17	124.279	113.874	219.764	0.518167	0.161099	0.00239391	10.6604	0.167923	0.478226	0.00359838	0.477681	0.132178	0.00180875	2477.78	25.3075	2493.98	14.7207	2519.54	15.7511	2509.22	32.2907
CZ23-18	136.245	121.698	239.116	0.50895	0.16148	0.00254989	10.8212	0.177316	0.484482	0.00376064	0.473707	0.133126	0.00209737	2472.22	26.855	2507.89	15.3258	2546.76	16.3885	2526.12	37.412
CZ23-19	52.5268	51.9181	96.2084	0.539642	0.152922	0.00277663	9.76881	0.175122	0.462603	0.00377611	0.45534	0.129855	0.00214681	2388.89	30.865	2413.21	16.5935	2451.04	16.6957	2467.7	38.4048
CZ23-20	79.384	55.3759	144.288	0.383786	0.162418	0.00268903	10.7678	0.172563	0.480054	0.00349068	0.45373	0.129261	0.00202553	2481.17	27.625	2503.29	14.9866	2527.5	15.2649	2457.07	36.2542
CZ23-21	84.0106	63.6943	148.517	0.428869	0.163528	0.00240066	10.9979	0.170236	0.486567	0.00403887	0.536258	0.133148	0.00200979	2492.28	19.5975	2522.95	14.5089	2555.8	17.5686	2526.53	35.8491
CZ23-22	16.5969	6.01439	34.0696	0.176532	0.147422	0.00316059	9.3192	0.225376	0.45813	0.0062552	0.564577	0.152082	0.00463789	2316.36	37.5025	2369.91	22.2349	2431.3	27.6855	2861.46	81.3676
CZ23-23	50.2277	29.7866	91.4055	0.325873	0.159413	0.00258533	10.64	0.174502	0.48329	0.00398749	0.503076	0.132584	0.00220755	2449.69	27.4675	2492.2	15.3162	2541.58	17.384	2516.47	39.3962
CZ23-24	107.263	92.3376	186.305	0.495626	0.165798	0.00252288	11.185	0.183803	0.487548	0.00364715	0.45522	0.137077	0.00202802	2516.66	21.295	2538.67	15.4134	2560.06	15.8656	2596.47	36.0493
CZ23-25	101.031	115.289	173.971	0.66269	0.163471	0.00277719	10.6995	0.188237	0.473289	0.00363513	0.436569	0.131873	0.00197677	2491.66	27.625	2497.38	16.4248	2497.97	15.9627	2503.77	35.2998
CZ23-26	115.756	101.976	191.872	0.531479	0.161741	0.00264402	10.9494	0.180176	0.490372	0.00456584	0.565834	0.140661	0.00244676	2473.76	27.78	2518.84	15.4057	2572.29	19.7977	2660.09	43.3559
CZ23-27	102.609	80.8274	193.923	0.416801	0.153863	0.00219429	9.70741	0.145723	0.455999	0.00329635	0.481554	0.130834	0.00182794	2390.74	24.07	2407.41	13.9155	2421.87	14.653	2485.2	32.6721
CZ23-28	169.538	152.183	292.597	0.520111	0.165255	0.00223462	11.1549	0.160445	0.487879	0.00386531	0.550822	0.134881	0.00176849	2510.18	22.53	2536.15	13.5136	2561.49	16.804	2557.41	31.4968
CZ23-29	133.85	134.158	230.432	0.582203	0.165467	0.00247939	10.9902	0.16683	0.480131	0.00364329	0.499877	0.135532	0.00181777	2512.03	26.0775	2522.3	14.2317	2527.84	15.9262	2569	32.356
CZ23-30	67.5093	58.8708	120.859	0.487101	0.161844	0.00275725	10.4989	0.19258	0.469326	0.00549485	0.638281	0.134258	0.00241528	2475.92	28.705	2479.82	17.0888	2480.61	24.1449	2546.31	43.0398
CZ23-31	32.2765	19.9536	59.5916	0.334839	0.163242	0.00332767	10.5837	0.212895	0.469055	0.00438365	0.464607	0.136891	0.00278138	2500	34.5675	2487.28	18.738	2479.42	19.2826	2593.17	49.4488
CZ23-32	61.4584	53.7797	107.762	0.499059	0.167751	0.00292624	11.0399	0.195667	0.475481	0.00399189	0.473691	0.136027	0.00212477	2535.49	29.32	2526.5	16.5907	2507.55	17.4932	2577.81	37.804
CZ23-33	41.453	46.5719	93.0593	0.500454	0.135022	0.00263979	7.10752	0.139961	0.38012	0.00302226	0.403758	0.109705	0.00178501	2164.5	33.18	2124.99	17.5882	2076.84	14.1612	2103.97	32.5123
CZ23-34	22.5362	12.2871	41.8706	0.293454	0.163019	0.00338275	10.4839	0.218685	0.464716	0.00414075	0.427167	0.13731	0.00350404	2487.34	35.185	2478.5	19.4089	2460.35	18.2724	2600.62	62.2736
CZ23-35	55.6851	53.9746	97.0117	0.556373	0.169521	0.0034176	11.0848	0.216643	0.473191	0.00461999	0.499557	0.134325	0.00220277	2552.78	32.8725	2530.28	18.2839	2497.54	20.2612	2547.5	39.2505
CZ23-36	53.7691	35.0987	103.195	0.34012	0.180037	0.00390345	10.9184	0.23191	0.43857	0.00443697	0.476307	0.135474	0.00246404	2653.4	35.805	2516.21	19.8314	2344.24	19.9229	2567.98	43.8616
CZ23-37	94.4499	84.1454	164.387	0.511874	0.165701	0.00414198	10.9595	0.27009	0.477576	0.00495357	0.420881	0.135103	0.00272455	2514.5	47.3775	2519.7	22.995	2516.7	21.6543	2561.36	48.5148
CZ23-38	48.5108	46.6514	84.5391	0.551832	0.163823	0.00369527	10.6096	0.239851	0.467226	0.0041029	0.388436	0.136125	0.00256509	2495.37	37.965	2489.55	21.0458	2471.39	18.0759	2579.55	45.6342
CZ23-39	51.2032	50.4954	96.2798	0.524465	0.156818	0.00311068	9.5127	0.188356	0.437884	0.00351751	0.405696	0.126069	0.00216431	2421.91	33.6375	2388.77	18.265	2341.16	15.8205	2399.86	38.8479
CZ23-40	54.4877	54.6164	96.1608	0.567969	0.164458	0.00300611	10.4803	0.182764	0.461041	0.00385191	0.479092	0.130554	0.00200586	2502.16	30.095	2478.18	16.2523	2444.15	17.0466	2480.2	35.861
CZ23-41	111.936	103.524	186.891	0.553927	0.168624	0.00264579	11.3289	0.180501	0.485617	0.00426525	0.551261	0.139731	0.00208492	2544.13	26.235	2550.59	14.9666	2551.68	18.5591	2643.61	36.9744
CZ23-42	29.9753	18.8988	55.3674	0.341335	0.161453	0.00316693	10.1744	0.191764	0.456338	0.00424579	0.493645	0.128636	0.0028493	2472.22	32.2525	2450.76	17.5045	2423.37	18.8393	2445.88	51.0268
CZ23-44	34.8198	19.6451	62.5214	0.314213	0.162798	0.00267844	10.698	0.189917	0.47494	0.00430844	0.511	0.136739	0.0027715	2484.87	27.78	2497.26	16.5719	2505.19	18.8791	2590.47	49.2797
CZ23-45	132.879	109.611	225.79	0.485456	0.161151	0.00216236	10.7996	0.147291	0.48486	0.00370488	0.560261	0.136543	0.00177299	2467.59	17.44	2506.03	12.7887	2548.4	16.1432	2586.98	31.5307
CZ23-46	34.2599	17.2417	62.2131	0.277139	0.158662	0.00244589	10.3376	0.16251	0.472062	0.0042883	0.577861	0.138849	0.00262135	2442.59	30.555	2465.47	14.6506	2492.6	18.8274	2627.96	46.5235
CZ23-47	68.5181	47.4842	121.141	0.391974	0.158426	0.00221833	10.1914	0.152392	0.465422	0.00369674	0.531182	0.135301	0.00211215	2439.2	22.9925	2452.3	13.9266	2463.45	16.3164	2564.89	37.6035
CZ23-48	31.3311	16.5255	57.3019	0.288393	0.157208	0.00278325	10.1955	0.181848	0.469775	0.00360942	0.43077	0.132213	0.00276932	2425.61	31.015	2452.67	16.577	2482.57	15.8876	2509.83	49.4378
CZ23-49	51.9566	32.0271	93.0414	0.344224	0.155647	0.0025447	10.1803	0.171373	0.473268	0.00361537	0.453803	0.133803	0.00248499	2408.95	27.775	2451.29	15.6528	2497.88	15.8768	2538.21	44.2998
CZ23-50	92.3112	78.1474	158.328	0.493578	0.157099	0.00234432	10.4704	0.158137	0.482141	0.00325604	0.447142	0.132753	0.00191552	2424.38	25.3075	2477.3	14.0996	2536.58	14.2279	2519.48	34.1794
CZ23-51	51.8875	28.4058	90.7266	0.313092	0.15821	0.00256233	10.6141	0.166561	0.485873	0.00349665	0.458604	0.140699	0.00255021	2436.72	27.93	2489.94	14.66	2552.8	15.2326	2660.75	45.1876
CZ23-52	94.5956	62.9243	164.397	0.382759	0.163417	0.00219117	10.8889	0.14505	0.481942	0.00309612	0.482268	0.137214	0.0019646	2491.05	22.5325	2513.69	12.5055	2535.72	13.5375	2598.91	34.9178
CZ23-53	45.3007	39.6013	80.1205	0.494272	0.160723	0.0024713	10.3459	0.161255	0.465743	0.00373005	0.513833	0.12652	0.0018608	2464.81	30.5575	2466.22	14.5284	2464.87	16.4589	2407.95	33.3869
(c)	ppm			232Th/238U	Corrected isotope ratios									Corrected ages (Ma)
	Pbtot	232Th	238U		207Pb/206Pb	1s	207Pb/235U	1s	206Pb/238U	1s	rho	208Pb/232Th	1s	207Pb/206Pb	1s	207Pb/235U	1s	206Pb/238U	1s	208Pb/232Th	1s
CZ28-01	282.798	100.755	1140.03	0.0883798	0.127234	0.00213934	4.20987	0.116745	0.236458	0.00455303	0.694346	0.0963768	0.00316611	2061.11	34.26	1675.94	22.7818	1368.25	23.7492	1859.75	58.3688
CZ28-02	249.163	39.8915	1184.98	0.0336643	0.116322	0.00171686	3.16178	0.0642609	0.195385	0.0023912	0.602159	0.189601	0.00684575	1901.85	27.0075	1447.88	15.7091	1150.48	12.9101	3509.2	116.315
CZ28-03	174.901	37.4893	307.162	0.122051	0.162435	0.00205534	11.1621	0.148735	0.496406	0.00376582	0.569316	0.135389	0.0021039	2481.17	20.5275	2536.75	12.5368	2598.33	16.2835	2566.46	37.4537
CZ28-04	151.717	120.93	870.387	0.138939	0.121031	0.00163776	2.51138	0.0364887	0.149876	0.0011302	0.51901	0.0996161	0.00139582	1972.22	24.0725	1275.33	10.587	900.271	6.35472	1919.38	25.6568
CZ28-05	292.302	44.6912	607.166	0.0736062	0.158509	0.0019463	9.27677	0.11578	0.422958	0.00252838	0.478972	0.145407	0.00241442	2439.81	19.905	2365.73	11.552	2273.89	11.5199	2744.02	42.6057
CZ28-06	238.785	28.0812	439.339	0.0639169	0.161483	0.00222087	10.7274	0.1554	0.480213	0.00348117	0.500422	0.125837	0.00228931	2472.22	23.155	2499.8	13.5618	2528.19	15.222	2395.68	41.1001
CZ28-07	275.486	70.7912	642.589	0.110166	0.158509	0.00227922	8.16096	0.126611	0.372163	0.00275735	0.477561	0.130925	0.00193455	2439.81	24.0725	2249.02	14.1164	2039.57	13.0007	2486.83	34.5748
CZ28-08	292.692	123.382	656.444	0.187956	0.156806	0.00200027	8.2907	0.112038	0.382237	0.00234763	0.454489	0.122509	0.00167641	2421.3	21.605	2263.3	12.341	2086.72	11.0066	2335.85	30.186
CZ28-09	152.005	18.1925	280.432	0.064873	0.159618	0.00203734	10.5005	0.137131	0.476048	0.00312947	0.503376	0.12768	0.00248271	2451.54	20.83	2479.96	12.2243	2510.03	13.7345	2428.76	44.4994
CZ28-10	198.817	37.5662	346.671	0.108363	0.159364	0.00198178	11.1992	0.165804	0.508343	0.0047736	0.634281	0.137889	0.00259233	2449.99	21.29	2539.85	13.9081	2649.55	20.4517	2610.92	46.0473
CZ28-11	309.802	118.919	710.009	0.167489	0.155444	0.00202355	7.8391	0.113812	0.364744	0.0028875	0.545272	0.131483	0.00170613	2406.48	22.22	2212.71	13.1603	2004.62	13.6821	2496.8	30.4774
CZ28-12	169.077	25.7235	311.357	0.0826174	0.15764	0.00221388	10.3762	0.15131	0.476212	0.00322215	0.463994	0.130792	0.00256249	2431.48	23.765	2468.92	13.6092	2510.75	14.1358	2484.45	45.803
CZ28-13	180.834	16.521	332.639	0.0496665	0.158219	0.00246673	10.5449	0.168031	0.482483	0.00365671	0.475619	0.124518	0.00249602	2436.72	26.2325	2483.87	14.8747	2538.07	15.9597	2372	44.8638
CZ28-14	458.013	103.543	820.431	0.126205	0.160137	0.00218141	10.7334	0.149581	0.484884	0.0028002	0.414394	0.127601	0.00183735	2457.09	22.375	2500.32	13.0555	2548.5	12.2343	2427.33	32.9345
CZ28-15	190.202	33.6257	335.205	0.100314	0.158982	0.00209935	10.9472	0.159318	0.498265	0.00403309	0.556181	0.133717	0.00217016	2455.55	22.2225	2518.66	13.6482	2606.33	17.4097	2536.66	38.6902
CZ28-16	212.475	77.714	356.539	0.217968	0.161327	0.00210144	11.396	0.164952	0.511317	0.00449241	0.606995	0.13229	0.00199848	2469.43	22.225	2556.1	13.6229	2662.25	19.2159	2511.21	35.6743
CZ28-17	159.073	21.7149	293.858	0.073896	0.162051	0.00228541	10.6268	0.151626	0.474668	0.0031592	0.466463	0.130853	0.00230381	2477.46	24.23	2491.05	13.3496	2504	13.8763	2485.55	41.177
CZ28-18	272.103	9.25731	606.674	0.0152591	0.155097	0.00245348	8.42513	0.164107	0.391997	0.00421384	0.551882	0.38873	0.017643	2402.78	26.85	2277.89	17.7472	2132.08	19.5485	6637.48	256.784
CZ28-19	314.965	140.4	727.05	0.193109	0.159158	0.00248817	7.9388	0.12824	0.360913	0.00268471	0.460494	0.125096	0.00183591	2446.6	26.54	2224.1	14.6455	1986.5	12.7622	2382.37	32.9819
CZ28-20	170.393	18.9584	313.872	0.0604018	0.164038	0.00237525	10.8884	0.162543	0.480367	0.00334373	0.466285	0.127937	0.00235399	2497.84	24.385	2513.64	13.9876	2528.86	14.6245	2433.36	42.1826
CZ28-21	204.132	28.5022	374.465	0.0761143	0.165767	0.00216903	11.0166	0.152001	0.480858	0.00324045	0.488413	0.130736	0.00226211	2516.66	22.22	2524.53	12.9581	2531	14.1723	2483.46	40.4358
CZ28-22	380.737	56.5002	862.139	0.0655349	0.1585	0.00204687	8.509	0.113092	0.388466	0.00226993	0.43965	0.17607	0.0103707	2439.81	21.91	2286.88	12.1758	2115.71	10.6006	3277.98	178.234
CZ28-24	276.877	40.6496	514.807	0.0789607	0.163909	0.00241399	10.9241	0.185017	0.482174	0.00447352	0.547799	0.142757	0.00247525	2498.15	24.2325	2516.69	15.8475	2536.73	19.5048	2697.19	43.7803
CZ28-25	354.6	67.5005	653.192	0.103339	0.163868	0.00257909	10.8628	0.183993	0.4795	0.00369548	0.455011	0.141918	0.00244199	2495.99	27.3175	2511.45	15.841	2525.09	16.1594	2682.34	43.2238
CZ28-26	242.694	46.4947	437.233	0.106339	0.164059	0.00250452	11.0753	0.166632	0.491573	0.00739191	0.999462	0.13147	0.00196221	2497.84	25.6175	2529.48	14.1168	2577.48	31.9773	2496.56	35.0522
CZ28-27	180.966	30.0795	331.305	0.0907912	0.16403	0.00229272	11.0814	0.171618	0.488797	0.00441641	0.583408	0.133898	0.0023396	2497.84	23.46	2530	14.5259	2565.47	19.1729	2539.89	41.7044
CZ28-28	174.782	44.5346	303.149	0.146906	0.165837	0.00238911	11.591	0.174017	0.505548	0.00391854	0.516288	0.138052	0.00209852	2516.36	24.0725	2571.95	14.1419	2637.6	16.8387	2613.8	37.2705
CZ28-29	303.67	31.9541	542.881	0.0588602	0.165501	0.00266623	11.4556	0.185688	0.500513	0.00370053	0.456124	0.161596	0.00288332	2512.65	26.08	2560.97	15.2372	2616	15.9606	3027.69	50.171
(d)	ppm			232Th/238U	Corrected isotope ratios									Corrected ages (Ma)
	Pbtot	232Th	238U		207Pb/206Pb	1s	207Pb/235U	1s	206Pb/238U	1s	rho	208Pb/232Th	1s	207Pb/206Pb	1s	207Pb/235U	1s	206Pb/238U	1s	208Pb/232Th	1s
CZ34-01	182.959	26.9434	332.753	0.0809714	0.163079	0.00259883	10.9591	0.184253	0.486288	0.00401037	0.490515	0.130266	0.00261032	2487.96	26.8525	2519.67	15.7375	2554.59	17.4486	2475.05	46.6797
CZ34-02	499.809	12.6846	935.856	0.013554	0.162953	0.00224915	11.0182	0.179505	0.489246	0.00512345	0.642793	0.141062	0.00382968	2486.73	22.38	2524.67	15.2627	2567.41	22.2209	2667.19	67.8371
CZ34-04	72.734	47.0121	128.265	0.366523	0.162654	0.00227169	10.5374	0.151886	0.468606	0.00312911	0.463264	0.124961	0.00184401	2483.64	22.9975	2483.21	13.4734	2477.45	13.8002	2379.96	33.1313
CZ34-05	228.723	24.4754	427.361	0.057271	0.16133	0.00217682	10.6611	0.151493	0.47786	0.00340821	0.501923	0.1245	0.00234589	2469.43	22.84	2494.05	13.2997	2517.94	14.9286	2371.67	42.166
CZ34-06	172.359	32.5863	307.131	0.106099	0.162052	0.00246685	11.1264	0.177327	0.496843	0.00439084	0.554508	0.126907	0.0022861	2477.46	25.6175	2533.77	14.9478	2600.21	18.962	2414.89	41.0035
CZ34-07	182.216	23.4901	343.91	0.0683029	0.163295	0.00252658	10.5804	0.166741	0.468596	0.00326388	0.441974	0.124495	0.0023344	2489.82	25.465	2486.99	14.7175	2477.4	14.3892	2371.58	41.9597
CZ34-08	152.691	24.6642	286.099	0.0862085	0.159624	0.00229342	10.5262	0.15831	0.477087	0.00352475	0.491241	0.118051	0.00211778	2451.54	24.07	2482.23	14.0478	2514.57	15.4428	2255.42	38.2855
CZ34-09	217.005	81.5225	394.749	0.206517	0.159758	0.00213218	10.5132	0.147559	0.476087	0.00306713	0.459	0.119175	0.00158495	2453.39	22.065	2481.08	13.1226	2510.2	13.4633	2275.74	28.624
CZ34-10	83.969	42.2777	149.24	0.283287	0.158785	0.00224848	10.4714	0.155622	0.47742	0.00326033	0.459507	0.122102	0.00172263	2442.9	22.99	2477.39	13.8775	2516.02	14.2905	2328.53	31.0294
CZ34-11	136.47	31.3879	252.638	0.124241	0.158055	0.00220767	10.4497	0.16515	0.478676	0.00416078	0.549993	0.115941	0.00206092	2434.87	23.7625	2475.46	14.7423	2521.5	18.1903	2217.24	37.328
CZ34-12	179.914	28.4751	336.026	0.0847406	0.155668	0.00230973	10.2092	0.160834	0.475037	0.00337142	0.450506	0.11846	0.002027	2408.95	25.7675	2453.91	14.6643	2505.61	14.7963	2262.82	36.6309
CZ34-13	244.83	42.9948	450.719	0.0953916	0.156228	0.00254537	10.3761	0.182371	0.48099	0.00358911	0.424549	0.124332	0.00220756	2416.66	27.775	2468.92	16.364	2531.58	15.6823	2368.65	39.6856
CZ34-14	186.955	71.9065	333.166	0.215828	0.155713	0.00228077	10.431	0.162492	0.485002	0.0031135	0.412098	0.119168	0.00165653	2409.57	25.46	2473.81	14.5314	2549.02	13.5857	2275.6	29.917
CZ34-15	138.086	31.7156	254.064	0.124833	0.157079	0.00207739	10.4192	0.145516	0.480447	0.00338779	0.504888	0.120005	0.00179826	2424.38	22.22	2472.76	13.0479	2529.21	14.8148	2290.71	32.4524
CZ34-16	55.8644	28.1105	100.334	0.280169	0.155434	0.00222861	10.3007	0.154508	0.480255	0.00393069	0.545649	0.121486	0.00218863	2406.48	23.61	2462.17	13.9833	2528.37	17.1722	2317.42	39.4451
CZ34-17	88.5413	30.2795	164.86	0.183668	0.156809	0.00221824	10.1831	0.151156	0.470027	0.00330597	0.473838	0.121843	0.00216032	2421.3	28.7	2451.54	13.8253	2483.68	14.5594	2323.85	38.9225
CZ34-18	124.772	28.6151	233.895	0.122342	0.156673	0.00241789	10.3196	0.16182	0.47675	0.00338387	0.452641	0.121967	0.0023663	2420.06	25.7675	2463.87	14.6118	2513.1	14.8337	2326.09	42.6289
CZ34-19	188.157	36.4756	352.344	0.103523	0.157707	0.00232668	10.4319	0.158471	0.478466	0.00348074	0.478891	0.121897	0.00196695	2431.17	25.77	2473.89	14.1755	2520.58	15.2377	2324.83	35.4368
CZ34-20	112.041	36.8813	204.143	0.180665	0.15998	0.00223122	10.6496	0.152818	0.481398	0.00333737	0.483126	0.126227	0.00215038	2455.24	23.455	2493.04	13.4271	2533.35	14.5871	2402.7	38.5925
CZ34-21	163.546	28.7704	296.246	0.0971167	0.159713	0.00205228	10.9478	0.145905	0.495557	0.00339952	0.514733	0.132408	0.00237138	2453.7	22.6825	2518.71	12.5174	2594.68	14.72	2513.32	42.3265
CZ34-22	104.625	65.8923	187.28	0.351838	0.160386	0.00218389	10.5318	0.153871	0.474342	0.00337138	0.486479	0.121169	0.00192752	2461.11	22.8425	2482.72	13.6532	2502.57	14.8029	2311.71	34.7489
CZ34-23	99.2643	26.2055	167.57	0.156385	0.164733	0.00240817	11.9746	0.199236	0.524988	0.00500528	0.573023	0.141162	0.00274418	2504.63	24.695	2602.42	15.6922	2720.3	21.2092	2668.96	48.6048
CZ34-24	229.976	163.747	402.717	0.406605	0.164415	0.00243927	10.8449	0.166152	0.476122	0.00324755	0.445201	0.124145	0.00160444	2501.54	25.7725	2509.92	14.345	2510.35	14.2471	2365.29	28.8481
CZ34-25	147.318	13.8009	280.407	0.0492174	0.164881	0.0026538	10.7951	0.175147	0.472734	0.00357887	0.466607	0.121487	0.00267028	2506.48	26.8525	2505.64	15.1736	2495.54	15.7232	2317.43	48.1258
CZ34-26	79.3389	50.1105	136.509	0.367085	0.168054	0.00260473	11.306	0.176964	0.48604	0.00355832	0.467731	0.124998	0.0017074	2538.58	25.925	2548.7	14.704	2553.52	15.4974	2380.62	30.6759
CZ34-27	82.4381	33.1983	145.651	0.22793	0.165009	0.00242589	11.2727	0.184218	0.49389	0.00487363	0.603836	0.129918	0.00229862	2509.26	25	2545.95	15.3393	2587.48	21.077	2468.82	41.1183
CZ34-28	103.316	39.9116	188.401	0.211844	0.167204	0.00229613	11.0319	0.15953	0.476726	0.00332619	0.482488	0.122376	0.00191967	2531.48	23.61	2525.83	13.572	2512.99	14.5832	2333.45	34.5703
CZ34-29	232.009	33.7385	435.622	0.0774489	0.164078	0.00223574	10.8152	0.152969	0.476504	0.00324797	0.481921	0.122673	0.00216179	2497.84	22.38	2507.37	13.2561	2512.02	14.2454	2338.8	38.9201
CZ34-31	100.956	84.5866	178.052	0.475066	0.164406	0.00272404	10.6295	0.179786	0.468225	0.00415472	0.524618	0.116865	0.00188711	2501.54	28.09	2491.28	15.7885	2475.77	18.2907	2233.97	34.1516
CZ34-32	100.611	69.2862	173.788	0.398682	0.162548	0.00257484	10.9113	0.176031	0.485924	0.00388504	0.495579	0.123206	0.00187831	2483.33	26.855	2515.6	15.1031	2553.02	16.9108	2348.4	33.8005
CZ34-33	188.07	35.9276	349.854	0.102693	0.162126	0.00228738	10.8022	0.16138	0.481846	0.00345957	0.48059	0.120709	0.00202879	2479.62	23.765	2506.25	13.9883	2535.3	15.1122	2303.42	36.5896
CZ34-34	90.9556	58.3611	156.614	0.372644	0.160377	0.00235835	10.9566	0.166867	0.494298	0.00351436	0.466835	0.119054	0.00177568	2461.11	24.6925	2519.45	14.2739	2589.24	15.2253	2273.55	32.0721
CZ34-35	219.085	47.3299	406.152	0.116532	0.160918	0.00203853	10.714	0.145951	0.481486	0.00330811	0.504356	0.122408	0.00183994	2465.12	21.6075	2498.64	12.7649	2533.74	14.4595	2334.04	33.1334
CZ34-36	201.493	35.9152	364.167	0.0986229	0.158703	0.0020344	10.9297	0.150801	0.498285	0.00382899	0.556939	0.124615	0.00214298	2441.66	22.375	2517.16	12.949	2606.42	16.5343	2373.74	38.5149
CZ34-37	172.393	33.2906	311.354	0.106922	0.159272	0.00206681	10.926	0.153723	0.496343	0.0038984	0.55825	0.128395	0.00247914	2447.83	21.9125	2516.85	13.1994	2598.06	16.8533	2441.57	44.4072
CZ34-38	147.281	76.8327	264.171	0.290845	0.156985	0.00203501	10.4054	0.142342	0.479626	0.00355241	0.541434	0.126943	0.00205623	2423.14	27.005	2471.53	12.7832	2525.64	15.5371	2415.53	36.8795
(e)	ppm			232Th/238U	Corrected isotope ratios									Corrected ages (Ma)
	Pbtot	232Th	238U		207Pb/206Pb	1s	207Pb/235U	1s	206Pb/238U	1s	rho	208Pb/232Th	1s	207Pb/206Pb	1s	207Pb/235U	1s	206Pb/238U	1s	208Pb/232Th	1s
ZZ17-8-01	25.2978	0.932068	69.1782	0.0134734	0.113345	0.00233668	5.2451	0.107394	0.336	0.00325059	0.472492	0.12701	0.0115223	1854.02	36.8825	1859.98	17.5068	1867.4	15.717	2416.73	206.645
ZZ17-8-02	52.7353	10.0224	140.187	0.0714931	0.113644	0.00187645	5.30307	0.0952963	0.337964	0.00317383	0.522594	0.103813	0.00293241	1858.34	29.94	1869.36	15.4041	1876.87	15.3253	1996.36	53.6963
ZZ17-8-03	51.8193	1.42554	140.453	0.0101496	0.113537	0.00177286	5.30404	0.0881891	0.338138	0.00256543	0.456306	0.160261	0.0114714	1857.41	28.3975	1869.51	14.2613	1877.71	12.4003	3004.45	199.837
ZZ17-8-04	57.5269	14.104	148.176	0.0951847	0.118151	0.00197553	5.7184	0.110594	0.349647	0.0028842	0.426522	0.111656	0.00299193	1928.71	29.9375	1934.15	16.7662	1932.91	13.8155	2139.47	54.3996
ZZ17-8-05	63.0459	6.55486	161.796	0.0405131	0.115304	0.00195472	5.73733	0.110337	0.359781	0.00309995	0.448027	0.139332	0.00551305	1884.88	31.3225	1937.01	16.681	1981.13	14.735	2636.52	97.8039
ZZ17-8-06	57.1143	3.68141	150.385	0.0244799	0.111686	0.00204473	5.43307	0.100654	0.35269	0.002991	0.457757	0.106677	0.00525293	1827.78	33.335	1890.09	15.939	1947.43	14.2927	2048.74	95.939
ZZ17-8-07	43.8577	8.60185	115.783	0.0742931	0.112192	0.00244607	5.39778	0.117827	0.348866	0.00308108	0.404591	0.103112	0.00355552	1835.5	40.28	1884.5	18.744	1929.18	14.7617	1983.54	65.1476
ZZ17-8-08	71.2081	26.467	189.367	0.139766	0.114924	0.00186552	5.39804	0.0921673	0.340006	0.00270214	0.465457	0.09834	0.00198752	1879.63	29.6275	1884.54	14.6832	1886.7	13.0391	1895.91	36.5753
ZZ17-8-09	93.1439	10.8812	233.271	0.0466463	0.134176	0.00245519	6.64857	0.150223	0.356961	0.0039166	0.485602	0.117699	0.00331034	2153.39	31.7925	2065.82	19.9922	1967.75	18.6366	2249.05	59.8635
ZZ17-8-10	92.4647	12.4919	250.563	0.0498554	0.113671	0.00163289	5.35299	0.081366	0.340945	0.00267185	0.515562	0.10043	0.00223019	1858.95	25.925	1877.37	13.067	1891.22	12.8851	1934.33	40.9631
ZZ17-8-11	55.6427	2.99212	151.216	0.019787	0.113397	0.00171287	5.32188	0.0824629	0.339685	0.00229375	0.43579	0.118628	0.00502804	1854.63	27.78	1872.38	13.3058	1885.15	11.0841	2265.84	90.8505
ZZ17-8-12	68.9908	12.5389	183.743	0.0682416	0.116632	0.00163762	5.46441	0.079175	0.339213	0.00254637	0.518089	0.105352	0.00229723	1905.25	25.775	1895.02	12.5028	1882.88	12.2993	2024.53	42.0066
ZZ17-8-13	53.8814	6.07456	149.503	0.0406318	0.115926	0.00177387	5.32841	0.0948787	0.332318	0.00312359	0.527874	0.106296	0.00370749	1894.13	27.4675	1873.43	15.2763	1849.6	15.1465	2041.79	67.7365
ZZ17-8-14	45.6105	0.470516	127.205	0.0036989	0.114166	0.00176949	5.25736	0.0847704	0.333185	0.00245385	0.456758	0.126808	0.0127761	1933.34	27.93	1861.97	13.8139	1853.8	11.9074	2413.12	229.173
ZZ17-8-15	84.9329	18.997	235.442	0.0806865	0.120032	0.00224065	5.41399	0.131723	0.324734	0.00389822	0.493393	0.0997545	0.00358554	1966.67	33.3325	1887.07	20.8922	1812.81	18.9947	1921.92	65.898
ZZ17-8-16	50.8991	3.47777	139.749	0.0248858	0.116019	0.00187767	5.3986	0.0905349	0.336405	0.0024494	0.434174	0.130896	0.00599745	1895.99	29.0125	1884.63	14.4239	1869.35	11.8582	2486.32	107.191
ZZ17-8-17	62.3316	9.03587	168.025	0.0537769	0.115739	0.00176745	5.43166	0.087384	0.339341	0.00248694	0.455543	0.110274	0.00295583	1891.66	27.775	1889.86	13.8553	1883.5	12.0131	2114.34	53.81
ZZ17-8-18	61.131	8.47537	164.883	0.0514024	0.116538	0.00168578	5.43979	0.0810135	0.337802	0.00236919	0.470937	0.11663	0.00303709	1905.56	25.93	1891.15	12.8382	1876.09	11.4612	2229.71	54.9746
ZZ17-8-19	66.109	16.335	174.943	0.0933731	0.113802	0.00181412	5.36258	0.085795	0.341215	0.00257687	0.472037	0.0989315	0.0022368	1860.81	34.105	1878.9	13.7512	1892.51	12.4276	1906.79	41.1407
ZZ17-8-20	112.958	25.3112	289.682	0.087376	0.11705	0.00225268	5.26939	0.095903	0.326712	0.0027696	0.465779	0.0882971	0.0143884	1922.22	34.7225	1863.92	15.584	1822.43	13.4933	1710.24	267.225
ZZ17-8-21	76.288	12.9581	207.116	0.0625647	0.114763	0.00185598	5.26706	0.0879408	0.332079	0.00248893	0.448899	0.104938	0.00288192	1876.24	29.4725	1863.54	14.3043	1848.45	12.0861	2016.96	52.7179
ZZ17-8-22	97.7535	14.0542	258.493	0.0543699	0.114708	0.00175639	5.41796	0.0889442	0.341631	0.00285011	0.508185	0.103486	0.00235029	1875.93	27.775	1887.7	14.1303	1894.51	13.7327	1990.38	43.0496
ZZ17-8-23	48.6747	1.9053	130.524	0.0145973	0.114111	0.00186613	5.37127	0.0922303	0.340448	0.00273313	0.467534	0.101885	0.00535713	1865.74	29.6275	1880.29	14.7542	1888.82	13.1835	1961.04	98.2676
ZZ17-8-24	226.917	15.4452	422.379	0.0365671	0.159941	0.00202621	10.3815	0.136986	0.469311	0.00342565	0.553182	0.144455	0.00290899	2455.24	20.525	2469.4	12.3358	2480.54	15.0892	2727.21	51.3756
ZZ17-8-25	56.6698	2.73905	149.685	0.0182988	0.113132	0.00161571	5.38189	0.076431	0.343976	0.00245408	0.502372	0.105779	0.00429654	1850.31	25.62	1881.98	12.2276	1905.77	11.816	2032.34	78.5353
ZZ17-8-26-C	122.043	132.304	186.814	0.708214	0.167266	0.00228496	11.1252	0.159807	0.48018	0.0035267	0.511299	0.143798	0.0018658	2531.48	23.145	2533.67	13.493	2528.05	15.4199	2715.6	32.9708
ZZ17-8-27	123.053	17.2481	322.609	0.0534646	0.13526	0.00205284	6.17169	0.0982285	0.329311	0.00263243	0.502247	0.275562	0.00482961	2168.51	27.0075	2000.45	13.9738	1835.04	12.8042	4919.39	76.5288
ZZ17-8-28	43.2614	26.9891	96.9041	0.278513	0.130958	0.00273756	6.61356	0.169756	0.361838	0.00425833	0.458496	0.121234	0.00263307	2110.8	36.7275	2061.16	22.6828	1990.88	20.1859	2312.89	47.4658
ZZ17-8-29	77.7726	9.99549	210.436	0.0474988	0.1094	0.00183278	5.08393	0.0850103	0.335247	0.00261424	0.466346	0.0958327	0.00237786	1790.74	31.02	1833.43	14.2426	1863.76	12.6613	1849.71	43.8588
ZZ17-8-30-C	117.876	92.9754	192.416	0.483199	0.163923	0.00237093	10.9101	0.153225	0.48034	0.00312832	0.463727	0.133267	0.00174129	2498.15	24.385	2515.5	13.1745	2528.75	13.6911	2528.65	31.0565
ZZ17-8-31	118.507	13.6513	389.502	0.035048	0.128041	0.00196657	4.81314	0.0680748	0.272449	0.00277029	0.718921	0.1108	0.00241747	2072.22	26.855	1787.2	11.9526	1553.22	14.0597	2123.91	43.9885
ZZ17-8-32	95.1275	27.1094	252.275	0.10746	0.110251	0.00152342	5.15472	0.0719861	0.337536	0.00218819	0.464217	0.0969704	0.00170777	1803.39	19.905	1845.17	11.9421	1874.81	10.5947	1870.69	31.4665
ZZ17-8-33-C	56.2512	60.0156	89.7508	0.668691	0.159303	0.00248808	10.5776	0.171479	0.479934	0.00423351	0.54412	0.136533	0.00203195	2449.99	27.005	2486.75	15.1339	2526.98	18.4911	2586.81	36.1364
ZZ17-8-34-C	132.025	309.933	316.198	0.980187	0.162824	0.00238555	7.19149	0.22624	0.318514	0.00885194	0.883404	0.0838952	0.00326774	2487.03	24.2325	2135.45	28.0814	1782.47	43.2892	1628.32	60.9361
ZZ17-8-35	62.923	8.21823	166.246	0.049434	0.113225	0.00191345	5.38073	0.0912262	0.343456	0.00253485	0.435314	0.0991159	0.0024169	1851.55	31.3275	1881.79	14.5734	1903.27	12.2065	1910.18	44.4456
ZZ17-8-36	72.6071	4.1327	195.316	0.021159	0.125382	0.00225235	5.8128	0.101886	0.335687	0.0028819	0.489795	0.311307	0.017837	2035.18	31.7875	1948.32	15.2429	1865.89	13.9453	5478.01	274.937
ZZ17-8-37	60.5677	9.36974	166.096	0.0564115	0.114229	0.00168456	5.25249	0.081562	0.332215	0.00263824	0.511414	0.0957914	0.00256057	1933.34	25.925	1861.18	13.3057	1849.11	12.8051	1848.95	47.2305
ZZ17-8-38	102.307	23.1732	273.881	0.0846105	0.114792	0.00160318	5.36414	0.0778158	0.337397	0.00224008	0.457673	0.0974816	0.00183702	1876.86	25.305	1879.15	12.4809	1874.14	10.8448	1880.1	33.8322
(f)	ppm			232Th/238U	Corrected isotope ratios									Corrected ages (Ma)
	Pbtot	232Th	238U		207Pb/206Pb	1s	207Pb/235U	1s	206Pb/238U	1s	rho	208Pb/232Th	1s	207Pb/206Pb	1s	207Pb/235U	1s	206Pb/238U	1s	208Pb/232Th	1s
ZZ29-2-01	46.3683	0.504444	132.992	0.00379305	0.114427	0.00179137	5.04827	0.0764183	0.318988	0.00219262	0.454081	0.428708	0.0294309	1872.22	28.3925	1827.46	12.8892	1784.79	10.7595	7211.13	416.364
ZZ29-2-02	21.7888	0.389512	60.9484	0.00639084	0.115725	0.00224137	5.26561	0.101484	0.329213	0.00311891	0.49156	0.15852	0.0171606	1891.05	34.105	1863.31	16.4949	1834.57	15.1585	2974.09	299.395
ZZ29-2-03	32.4726	0.758996	91.9016	0.00825879	0.114699	0.00229355	5.1747	0.105687	0.326055	0.0030556	0.458847	0.127539	0.0106075	1875.93	36.11	1848.46	17.4249	1819.23	14.8868	2426.22	190.149
ZZ29-2-04	18.0108	0.344972	50.938	0.00677239	0.115657	0.00283702	5.20509	0.119787	0.326063	0.00307013	0.409142	0.173759	0.0182533	1900	44.445	1853.45	19.6421	1819.27	14.9572	3238.23	314.323
ZZ29-2-05	44.9261	1.2009	125.32	0.00958264	0.114198	0.00220613	5.24035	0.102186	0.331553	0.00296544	0.458674	0.114904	0.00777173	1933.34	34.875	1859.2	16.675	1845.9	14.3911	2198.45	140.895
ZZ29-2-06	17.8731	0.350048	50.3393	0.00695377	0.1169	0.00252613	5.27876	0.116244	0.326381	0.00288743	0.401741	0.142285	0.0148423	1909.57	38.89	1865.43	18.8414	1820.82	14.0677	2688.84	262.628
ZZ29-2-07	20.805	0.758066	57.4885	0.0131864	0.113642	0.00229137	5.22769	0.107807	0.332616	0.0029831	0.434897	0.113487	0.00835152	1858.34	36.7275	1857.14	17.6226	1851.05	14.4651	2172.74	151.598
ZZ29-2-08	27.8235	0.354344	77.5928	0.0045667	0.110795	0.00203255	5.06771	0.0931992	0.331131	0.00300937	0.494168	0.160115	0.0222435	1812.96	33.335	1830.72	15.6457	1843.86	14.6078	3001.91	387.539
ZZ29-2-09	16.4232	0.665889	46.1559	0.014427	0.112525	0.00243335	5.08671	0.107904	0.328105	0.00338365	0.486154	0.101302	0.00867106	1840.43	34.26	1833.89	18.0436	1829.19	16.4534	1950.33	159.14
ZZ29-2-10	22.5601	0.424921	62.5663	0.00679153	0.113336	0.00214094	5.19036	0.097177	0.33189	0.00313691	0.504826	0.174142	0.0224568	1853.4	33.49	1851.04	15.9892	1847.54	15.2156	3244.83	386.582
ZZ29-2-11	79.3635	4.95119	243.741	0.0203133	0.116936	0.00193573	4.74888	0.0813007	0.293806	0.00247768	0.492586	0.202375	0.0111265	1910.18	29.6325	1775.91	14.4102	1660.52	12.3776	3725.09	187.039
ZZ29-2-12	22.1334	0.497362	62.2243	0.00799304	0.113038	0.00222499	5.11602	0.107073	0.327717	0.0033336	0.486033	0.141806	0.014026	1850.01	35.805	1838.77	17.8203	1827.31	16.2156	2680.37	248.288
ZZ29-2-13	20.5352	0.453859	57.7468	0.00785947	0.11012	0.00220462	5.01421	0.100671	0.330308	0.00319141	0.481238	0.129794	0.0121989	1811.11	37.04	1821.72	17.0415	1839.87	15.4968	2466.6	218.24
ZZ29-2-14	18.5571	0.392649	51.215	0.00766668	0.11046	0.00209237	5.12016	0.094469	0.336254	0.00293366	0.472865	0.0976147	0.00981614	1807.1	35.34	1839.46	15.723	1868.62	14.1886	1882.55	180.761
ZZ29-2-16	17.1219	0.41722	47.3986	0.00880236	0.110987	0.00238831	5.13975	0.106315	0.336569	0.00348788	0.500995	0.125329	0.0129111	1816.66	38.89	1842.7	17.6268	1870.14	16.8527	2386.57	231.899
ZZ29-2-17	19.766	0.412794	55.7437	0.00740522	0.111555	0.00219314	5.06159	0.0995141	0.328994	0.00281404	0.435056	0.190153	0.0165031	1824.99	36.2675	1829.69	16.7161	1833.5	13.6857	3518.58	280.27
ZZ29-2-18	25.0445	0.610385	72.0134	0.00847599	0.11332	0.00224764	5.08117	0.103025	0.32492	0.0029454	0.447082	0.136449	0.0110214	1853.71	35.805	1832.97	17.2474	1813.71	14.3643	2585.32	196.021
ZZ29-2-19	16.2273	0.352855	45.2542	0.00779718	0.11199	0.00283576	5.17637	0.130205	0.335973	0.00333693	0.394858	0.172336	0.0262336	1831.79	44.9075	1848.74	21.4422	1867.27	16.1331	3213.7	452.294
ZZ29-2-20	18.8055	0.367203	51.3248	0.00715449	0.10924	0.00255371	5.14241	0.121646	0.341143	0.00309674	0.383739	0.161234	0.0158378	1787.04	42.5925	1843.14	20.148	1892.17	14.92	3021.39	275.669
ZZ29-2-21	23.6636	0.328723	66.1047	0.00497276	0.112437	0.00221758	5.19153	0.102517	0.334819	0.00309612	0.468284	0.160021	0.016856	1839.2	36.5775	1851.23	16.8593	1861.7	14.9863	3000.27	293.7
ZZ29-2-22	17.722	0.700713	48.9325	0.01432	0.110633	0.00216263	5.16819	0.102577	0.338596	0.00298905	0.444773	0.110558	0.00949481	1809.57	40.895	1847.39	16.9325	1879.91	14.4304	2119.5	172.806
ZZ29-2-23	17.5323	0.386752	49.5329	0.00780797	0.114661	0.00234705	5.2421	0.110249	0.331606	0.00349138	0.500617	0.186972	0.0215159	1875.93	35.955	1859.49	17.9784	1846.16	16.9314	3464.48	366.382
ZZ29-2-24	20.3642	0.459249	58.1572	0.00789669	0.112034	0.00225315	5.06423	0.102298	0.327321	0.00263229	0.398112	0.147345	0.0150325	1832.41	36.42	1830.13	17.1738	1825.38	12.8222	2778.18	264.82
ZZ29-2-25	23.0087	0.478493	66.9756	0.00714429	0.116215	0.00225745	5.09188	0.0951569	0.31781	0.00298333	0.50231	0.629222	0.0438114	1899.08	34.105	1834.75	15.9096	1779.02	14.6253	9865.64	543.527
ZZ29-2-26	16.3753	0.340575	45.8886	0.00742179	0.115996	0.00272803	5.30984	0.118199	0.332638	0.00308077	0.41606	0.153365	0.0158847	1895.37	42.5925	1870.45	19.0631	1851.16	14.9362	2883.96	278.372
ZZ29-2-27	17.6549	0.368712	50.6599	0.00727819	0.112726	0.00243926	5.06951	0.111304	0.326201	0.00307904	0.429917	0.177905	0.019473	1843.52	38.89	1831.02	18.6619	1819.94	14.9989	3309.5	334.147
ZZ29-2-28	23.3875	0.464673	66.3475	0.00700362	0.113284	0.00218204	5.13734	0.0988327	0.328806	0.00264319	0.417855	0.118361	0.0123802	1853.71	34.88	1842.3	16.3992	1832.59	12.861	2261.03	223.748
ZZ29-2-29	24.4706	0.306873	68.7082	0.00446633	0.113986	0.00202869	5.22135	0.0973106	0.33207	0.00311278	0.502969	0.256518	0.0238741	1864.82	32.4075	1856.11	15.9321	1848.41	15.097	4615.34	384.036
ZZ29-2-30	20.6453	0.365909	57.9601	0.00631313	0.115768	0.00249702	5.28143	0.114484	0.330741	0.00289209	0.403395	0.163175	0.0178575	1891.66	38.89	1865.87	18.5496	1841.97	14.0452	3055.14	310.305
ZZ29-2-31	22.8278	0.65524	67.4178	0.00971909	0.114785	0.0022689	4.97382	0.108479	0.313557	0.00305113	0.44616	0.318014	0.0237377	1876.24	40.8975	1814.88	18.4796	1758.19	15.0038	5581.12	364.026
ZZ29-2-32	37.2113	1.04065	107.375	0.00969168	0.112854	0.00214057	5.01539	0.0948213	0.322465	0.00281632	0.461953	0.112535	0.00871328	1855.56	33.49	1821.92	16.0535	1801.76	13.7627	2155.46	158.3
ZZ29-2-33	17.5704	0.419223	48.7824	0.00859374	0.118044	0.00265075	5.41234	0.123702	0.332603	0.00311715	0.410052	0.16389	0.0148389	1927.79	39.66	1886.81	19.63	1850.99	15.1122	3067.56	257.693
ZZ29-2-34	29.8378	0.602586	84.0479	0.00716955	0.112586	0.00223194	5.12705	0.103052	0.330419	0.0029347	0.441884	0.137921	0.0156841	1842.6	35.65	1840.6	17.1238	1840.41	14.2545	2611.48	278.587
ZZ29-2-35	30.5662	2.09508	95.333	0.0219765	0.115789	0.00257935	4.75614	0.103653	0.298755	0.00291577	0.447826	0.21607	0.0113512	1892.28	40.125	1777.19	18.3243	1685.13	14.5011	3954.01	188.668
ZZ29-2-36	21.9782	0.405882	63.0548	0.00643697	0.10974	0.00230758	4.9511	0.105668	0.327567	0.0031364	0.448632	0.162982	0.0173731	1795.37	33.1825	1811.01	18.0712	1826.58	15.2617	3051.78	301.939
ZZ29-2-37	25.2248	0.399367	71.1893	0.00560993	0.112363	0.00212486	5.11975	0.0951005	0.330581	0.00266976	0.434771	0.173668	0.0177419	1838.89	34.4175	1839.39	15.8285	1841.2	12.9727	3236.67	305.541
ZZ29-2-38	25.5613	0.336369	73.1383	0.00459908	0.112603	0.00198196	5.04095	0.0898937	0.32476	0.0029097	0.502421	0.299097	0.0331372	1842.6	31.79	1826.23	15.1606	1812.93	14.1927	5288.93	515.571
ZZ29-2-39	63.0466	1.27916	179.466	0.0071276	0.116113	0.00178861	5.18544	0.0862993	0.323172	0.0024548	0.456416	0.269915	0.0233185	1898.15	27.47	1850.23	14.2224	1805.2	11.9993	4829.71	371.143
ZZ29-2-40	22.4599	0.317046	64.6053	0.00490743	0.114335	0.0025215	5.23943	0.11596	0.331879	0.00307427	0.41854	0.151586	0.0144751	1869.44	39.97	1859.05	18.9132	1847.48	14.9131	2852.76	254.061
ZZ29-2-41	19.771	0.392578	54.6901	0.00717823	0.11115	0.00251145	5.29678	0.119272	0.345257	0.00323628	0.416273	0.146379	0.0150939	1818.21	41.0475	1868.34	19.275	1911.91	15.5425	2761.15	266.127
ZZ29-2-42	18.1134	0.312959	51.3102	0.00609937	0.114065	0.00210349	5.26899	0.0994845	0.334414	0.00304111	0.481636	0.135748	0.0173259	1865.13	33.025	1863.85	16.1632	1859.74	14.7256	2572.84	308.339
ZZ29-2-43	28.0819	0.651954	78.6441	0.00828993	0.114363	0.0020363	5.30895	0.0956127	0.336116	0.0030043	0.496304	0.126911	0.0100689	1870.06	31.325	1870.3	15.4407	1867.96	14.53	2414.96	180.596
ZZ29-2-44	20.1223	0.441922	58.3741	0.00757051	0.112797	0.00220758	5.03869	0.0976881	0.323427	0.00276812	0.441452	0.156796	0.0173362	1855.56	35.495	1825.85	16.4727	1806.44	13.5187	2944	302.908
ZZ29-2-45	22.9581	0.428996	65.9195	0.00650787	0.115389	0.00239176	5.1577	0.105483	0.323252	0.00237369	0.359051	0.423286	0.0714292	1887.04	37.035	1845.67	17.439	1805.59	11.6048	7134.28	1014.37
ZZ29-2-46	21.9132	0.382867	61.1232	0.00626386	0.115944	0.00233979	5.40228	0.111924	0.33698	0.0034696	0.496971	0.139272	0.0178761	1894.75	36.885	1885.21	17.797	1872.12	16.7596	2635.46	317.147

## Sheet: TABLE S2
(a)	La	Ce	Pr	Nd	Sm	Eu	Gd	Tb	Dy	Ho	Er	Tm	Yb	Lu
CZ22-02	1.34629	17.6514	1.90442	14.1067	8.85119	2.47076	13.505	2.70076	27.2527	9.89368	45.6695	9.7021	89.4766	18.1663
CZ22-03	0.00592565	7.27544	0.0120802	0.10914	0.309767	0.382105	2.77945	0.963786	13.3051	5.79124	29.5066	6.9498	66.4807	14.0907
CZ22-06	0.00906813	9.88753	0.0273592	0.292932	0.737339	0.444669	5.26127	1.7817	22.2392	9.24062	44.2741	9.76979	89.8136	17.7827
CZ22-08	0.00824295	5.92645	0.0173309	0.231245	0.49561	0.410491	4.02988	1.50431	19.7641	8.35491	41.5361	9.29924	87.7389	18.1851
CZ22-09	0.0106422	7.33595	0.0113913	0.191071	0.344979	0.354307	3.32286	1.28699	17.1101	7.32478	37.82	8.36404	80.3526	16.5222
CZ22-10	0.0172853	6.23899	0.0198238	0.310339	0.389555	0.369242	2.44976	1.03589	13.9131	5.75222	29.914	6.86268	67.074	14.0619
CZ22-12	0	6.64013	0.0127392	0.196303	0.500932	0.303195	3.17972	1.21212	15.8048	6.7449	33.6496	7.6659	70.3017	14.6209
CZ22-13	0.480616	10.3532	0.603867	4.65446	1.85651	0.684897	4.95671	1.49918	18.33	7.74906	36.2279	8.00832	76.4178	15.4701
CZ22-14	0.0102603	6.75905	0.0125523	0.221043	0.386288	0.313872	2.65481	1.08865	13.3898	5.70993	29.2892	6.76735	66.5266	14.0739
CZ22-15	0.0145765	7.59955	0.0270678	0.411223	0.577112	0.435938	3.54176	1.29182	17.4292	7.38325	36.7318	8.25587	77.282	15.7702
CZ22-18	0.00879463	8.36816	0.0134504	0.207212	0.60943	0.440245	3.44247	1.1588	14.9752	6.38341	30.6777	6.93511	66.2921	13.6814
CZ22-20	0.675346	8.42229	0.278212	2.10197	1.35587	0.532962	4.02711	1.13688	13.2223	5.50485	24.9915	5.41264	49.3807	10.049
CZ22-21	0.00212847	6.8705	0.016277	0.229246	0.456428	0.479612	4.004	1.45905	18.8756	7.97566	39.7799	8.72601	81.8239	16.8106
CZ22-22	0.00439544	6.69542	0.018488	0.328805	0.643741	0.483042	3.9857	1.39628	18.4983	7.53768	37.7788	8.15688	80.9234	16.4379
CZ22-23	4.47317	45.6319	6.87583	47.8941	9.59038	2.29722	10.564	2.23601	25.1801	9.89217	45.6238	9.71694	86.0809	16.464
CZ22-25	0.0321791	7.4232	0.0475801	0.770128	1.12219	0.530554	6.15531	2.24198	28.2193	11.5917	52.3763	11.266	99.6481	18.9405
CZ22-27	0	9.03592	0.00839589	0.295556	0.516837	0.377032	3.42048	1.2593	17.3617	6.91278	34.7457	7.761	73.0779	14.9428
CZ22-28	0	4.26659	0.0181618	0.209264	0.621122	0.405801	3.66454	1.56623	20.3843	8.69265	41.1065	9.14042	83.7883	16.0424
CZ22-29	0.512946	15.0706	1.41045	12.2925	6.82811	2.14539	11.4357	2.20056	20.3645	7.49334	34.2387	7.43418	67.0176	13.0827
CZ22-30	0.00436012	7.33931	0.00666995	0.195634	0.467642	0.274928	3.30572	1.18375	15.6502	6.61775	31.8841	7.17012	67.0634	13.8952
CZ22-31	4.17224	40.2487	5.6009	37.8183	13.5434	3.67681	15.8528	2.88785	24.1738	7.80228	33.871	7.42042	74.2403	17.1005
(b)	La	Ce	Pr	Nd	Sm	Eu	Gd	Tb	Dy	Ho	Er	Tm	Yb	Lu
CZ23-01	0	3.22522	0.0147014	0.109781	0.562124	0.397526	2.56904	1.08546	14.9149	6.06477	29.1672	7.26701	79.4754	14.9444
CZ23-02	0	6.39179	0.0246079	0.12409	0.366535	0.351066	2.32407	1.03567	12.9156	5.49593	27.6423	6.85893	65.5859	10.0072
CZ23-03	0.119863	7.91344	0.0832673	1.06431	0.975409	0.516125	3.42479	1.34032	15.8518	5.86624	28.066	6.98205	70.9012	12.0464
CZ23-04	0.0228636	7.10944	0.0269759	0.453834	0.640438	0.369168	3.17022	1.05092	12.6734	5.04722	24.4948	6.16556	67.2066	13.1367
CZ23-05	0.0610488	4.44054	0.0529279	0.862554	0.580391	0.48334	2.12014	0.63021	7.96587	3.16543	15.5963	3.86844	45.1498	8.60316
CZ23-06	0.0500068	6.15978	0.0415089	0.507079	0.745333	0.479856	4.11396	1.32401	15.6167	6.03569	28.5	7.27079	76.8306	14.8672
CZ23-07	0	4.98729	0.0117982	0.0928328	0.412758	0.29922	2.22315	0.787375	10.6705	4.47138	21.9247	5.68431	60.6337	10.6505
CZ23-08	0	4.64729	0.0288173	0.283558	0.849552	0.411313	3.66581	1.42189	18.0518	7.21428	35.818	8.56945	91.6291	17.6391
CZ23-09	0.116736	5.33843	0.100698	0.934651	0.882399	0.766854	4.56071	1.67205	19.9354	8.19714	36.4093	8.91921	94.0112	16.3075
CZ23-10	0.0137149	8.87666	0.0123329	0.319273	0.911753	0.653818	6.18496	2.25167	30.0919	11.9604	55.2278	12.964	119.012	18.214
CZ23-11	0.110358	6.67709	0.166352	1.81731	1.07434	0.614747	4.54126	1.3285	15.7897	6.67821	31.5808	7.97561	86.7292	16.8994
CZ23-12	0.00933806	8.94376	0.0252301	0.397927	1.04524	0.716535	7.18402	2.66049	33.3004	13.3821	61.96	14.011	128.939	20.2393
CZ23-14	0	1.97107	0.00253409	0.0286125	0.0799145	0.101633	0.817952	0.338534	4.60539	2.11504	11.6219	3.34282	40.3278	8.78077
CZ23-15	0.00927214	3.69756	0.0125844	0.199018	0.429022	0.365302	2.59433	1.11811	13.6422	5.81829	31.14	7.84951	89.4423	18.4153
CZ23-16	0	7.49589	0.00778092	0.190525	0.475311	0.25655	2.88338	1.11441	13.3698	5.9153	26.8397	6.53916	60.2998	9.49152
CZ23-17	0.302747	7.80097	0.29378	2.77756	1.34565	0.669984	3.62532	1.20966	13.7347	5.36426	26.74	6.90241	75.2907	15.8104
CZ23-18	0.124659	7.68885	0.0782727	1.04771	0.759898	10.6463	3.02108	0.998764	10.701	4.13691	20.5755	5.06507	50.0171	9.07617
CZ23-19	0.0144284	6.27697	0.0209876	0.222872	0.466447	0.297436	2.32482	0.986067	13.0057	5.26714	27.029	6.99873	69.0341	11.4136
CZ23-20	0.014125	5.62364	0.0128517	0.174768	0.245062	0.355635	2.12275	0.855482	10.5365	4.2971	20.7116	5.14016	55.6338	9.80328
CZ23-21	0.0237618	5.93807	0.0155788	0.397408	0.908575	0.513139	4.67086	1.66322	21.105	8.47215	40.9867	10.0402	102.927	17.8572
CZ23-22	0.198924	9.87829	0.293428	3.91657	3.57636	2.50614	8.61631	0.910051	7.07441	2.47395	12.0865	3.37308	41.4604	8.88283
CZ23-23	0	4.54723	0.00258842	0.249676	0.363013	0.302691	2.54792	0.969503	13.3988	5.66077	27.6072	7.23313	78.5376	14.5301
CZ23-24	0	4.82643	0.0102853	0.262737	0.525043	0.333092	3.96974	1.43912	17.1531	7.24088	34.9991	8.76108	95.6454	18.2755
CZ23-25	0.00454576	8.06784	0.00499556	0.298316	0.512034	0.395298	2.96024	1.23599	14.3731	6.50464	31.949	8.15667	82.8531	13.4703
CZ23-26	0.625101	8.5572	0.610305	5.27273	2.6516	1.40267	5.82003	1.28044	15.2092	6.04919	26.9543	6.30876	68.2015	12.5318
CZ23-27	0.0136191	5.35459	0.0124929	0.17068	0.43302	0.380519	2.64185	0.948492	12.7855	5.16177	25.8581	6.65535	73.0903	13.1264
CZ23-28	0.338247	11.6838	0.400944	3.976	1.75781	0.95261	4.33001	1.33473	14.6854	5.54391	25.6948	6.05194	59.031	10.0411
CZ23-29	0.00863307	7.52142	0.0142782	0.393225	0.612203	0.39309	2.83739	1.33944	16.3593	6.62212	31.0099	7.38135	75.1997	12.6604
CZ23-30	0.0133898	3.55695	0.0270892	0.365008	0.475628	0.356783	3.35865	1.14697	13.9231	5.86048	29.8828	7.66619	87.9548	17.9751
CZ23-31	0.0138784	2.79043	0	0.131478	0.346996	0.258681	1.84182	0.792341	9.83331	4.27985	22.1362	5.83424	67.1083	13.746
CZ23-32	0	4.75298	0.0179865	0.249486	0.431812	0.365633	2.55085	1.03393	11.0973	4.98877	23.7346	5.93476	65.6347	11.6999
CZ23-33	0.0926088	7.29532	0.0410515	0.483816	0.664012	0.41013	2.55098	1.15891	13.767	5.80771	29.1652	7.02103	68.0088	11.3997
CZ23-34	0	2.81783	0.00788324	0.22534	0.323354	0.302225	2.9333	1.05313	14.1676	6.19477	29.9268	7.76104	86.7973	16.9623
CZ23-35	0	4.60495	0.00524083	0.134892	0.2888	0.407253	2.62996	1.16454	14.4766	6.14343	32.7482	8.32133	86.4533	14.4334
CZ23-36	0.36527	6.9837	0.427192	3.10157	1.8193	0.818029	5.29963	1.6743	20.9959	8.54256	41.3299	10.3351	109.531	19.6834
CZ23-37	0.00906851	4.7249	0.0176935	0.507228	0.70819	0.515702	4.12576	1.37578	17.1313	7.30288	35.7685	8.94611	96.6488	18.9005
CZ23-38	0.0139273	5.98131	0.0025902	0.208014	0.371674	0.347159	2.32474	0.93449	13.4713	5.78981	30.4313	7.34544	71.6172	11.5979
CZ23-39	0.00911103	5.5802	0.0101758	0.102199	0.332188	0.300675	2.2214	1.06639	14.8733	6.54211	33.2398	8.27852	80.8201	13.1919
CZ23-40	0.00898277	6.43059	0.0125517	0.0720704	0.262507	0.297008	2.53443	1.09889	14.3547	6.24314	31.5235	7.90715	74.7918	12.4104
CZ23-41	0.00448673	5.8775	0.0200797	0.360473	0.607572	0.413764	2.7481	1.0313	12.1803	5.00506	24.8883	6.16714	67.4989	13.2201
CZ23-42	0	3.18275	0.00260227	0.239305	0.664644	0.546158	3.35714	1.32359	16.2119	6.47934	32.914	8.51357	94.5736	18.4724
CZ23-44	0.0360002	4.04725	0.0177006	0.276681	0.266049	0.366115	3.03624	1.07161	14.466	6.36126	30.0259	7.96515	85.2906	15.7179
CZ23-45	0.017599	7.08301	0.0420672	0.684364	0.602689	0.458276	3.41019	1.23065	14.5001	6.30938	30.176	7.9118	86.2175	15.8042
CZ23-46	0.00881434	2.94283	0.0124048	0.0858098	0.261568	0.335957	2.2452	0.876308	10.5953	4.65038	24.9515	6.75072	76.8457	14.7268
CZ23-47	0.0402282	4.70003	0.0428147	0.435758	0.431925	0.268239	1.87216	0.729968	9.36697	3.75594	19.2666	5.25957	57.4076	10.2576
CZ23-48	0	2.90213	0.00497722	0.0574399	0.394373	0.27337	2.38915	0.949134	12.8465	5.36176	27.4697	7.32302	82.8551	16.2281
CZ23-49	0.0136025	3.87927	0.00513307	0.281947	0.408412	0.299763	3.23839	1.30149	16.8273	6.9385	34.2133	8.77588	93.9171	17.2812
CZ23-50	0	4.37123	0.0154081	0.267396	0.460207	0.408674	3.21152	1.17673	14.6284	6.49542	31.8415	7.84136	88.5815	17.4122
CZ23-51	0.0418432	4.36492	0.0659147	0.53409	0.525542	0.377167	3.02433	1.13536	14.9962	6.01894	29.1954	7.67548	85.563	15.4329
CZ23-52	0	4.46246	0.00518001	0.269959	0.568476	0.284803	3.21498	1.17136	14.4022	6.07203	30.3225	7.5915	83.2158	16.8305
CZ23-53	0	3.97881	0.0121495	0.0844665	0.453001	0.482918	3.02099	1.109	13.8304	6.07963	29.4895	7.80149	88.6114	15.9824
(c)	La	Ce	Pr	Nd	Sm	Eu	Gd	Tb	Dy	Ho	Er	Tm	Yb	Lu
CZ28-01	8.23267	23.9193	2.11555	9.39356	2.91004	2.52631	10.331	2.67909	24.0824	6.60768	21.3358	3.82032	29.5159	4.35589
CZ28-02	2.51876	9.61753	0.56891	2.96468	1.96737	2.61976	11.1785	4.45941	54.4654	20.5038	88.7684	20.1555	192.524	33.6856
CZ28-03	0.0536458	3.36189	0.105066	1.02693	3.15434	1.08764	21.9652	8.40302	81.2962	21.8484	72.4447	13.1975	105.008	15.716
CZ28-04	1.31856	8.34129	0.305776	2.07173	2.74176	0.922183	7.51141	2.16519	18.9492	5.08642	16.6738	2.7626	21.4	3.30794
CZ28-05	0.103158	4.01521	0.0215097	0.484011	1.2112	0.384789	6.83718	2.60415	32.3213	12.0366	51.3891	11.1385	109.827	19.0627
CZ28-06	0.0128023	4.92899	0.00734208	0.270004	0.987089	0.330111	7.0465	3.25632	46.3383	19.1395	88.5848	20.0981	196.355	34.1
CZ28-07	0.251381	6.92199	0.446578	6.36055	18.132	3.33517	106.339	39.0099	391.232	105.58	331.796	50.765	350.515	42.7446
CZ28-08	0.014298	6.97659	0.0273505	0.492171	1.13895	0.503831	6.65988	2.20405	23.9521	8.39842	34.2632	7.21756	64.6725	10.8169
CZ28-09	0.0568001	4.22634	0.16802	2.21252	4.31109	3.8897	23.9883	8.26957	69.5335	15.6664	40.2695	5.54809	35.1277	4.42983
CZ28-10	0.0636512	4.43178	0.0887377	1.4845	5.01147	1.05166	31.6377	10.4903	83.039	16.5525	37.9853	4.96416	29.3311	3.68594
CZ28-11	0.00918087	5.54983	0.0158134	0.367094	1.02607	0.650178	5.84994	1.73405	15.8415	4.48035	15.5634	2.58431	21.5153	2.92242
CZ28-12	0.144073	7.34204	0.449856	5.58128	6.26359	10.0615	25.0771	6.45638	54.4306	12.6552	33.2202	5.19022	37.7697	5.21379
CZ28-13	0.00415449	2.12814	0.0238719	0.728411	2.241	0.431805	16.2481	6.1911	53.3445	11.9022	31.3542	4.51631	30.493	3.91886
CZ28-14	0	5.64641	0.0118454	0.371058	0.984705	0.755751	7.67956	2.36614	23.6223	7.14508	26.1336	4.76458	39.797	6.36101
CZ28-15	0.0303219	4.112	0.154369	1.94971	3.22085	1.52303	20.7975	6.82163	55.9339	11.3159	27.0305	3.60259	23.534	2.99029
CZ28-16	0.0541631	5.89867	0.11936	1.70064	7.51184	0.785041	41.2917	16.1316	168.959	46.9644	154.003	25.1037	182.739	23.9162
CZ28-17	0.341186	12.9148	0.667504	5.30458	4.84771	10.0972	19.8836	6.50859	63.4307	16.5697	49.814	7.5622	51.8301	6.50351
CZ28-18	0.242786	3.97283	0.125075	0.877151	1.28593	1.33915	6.63079	2.25015	24.1752	7.73173	27.0394	4.90494	39.5933	5.8967
CZ28-19	0.00482718	9.1266	0.0444368	0.483075	1.67327	0.456599	8.9454	3.50889	39.9644	13.9577	56.243	11.5433	102.465	16.2218
CZ28-20	0.00871591	2.36265	0.0351083	0.756003	2.46723	0.424639	16.0701	6.61766	61.7721	15.8088	42.6037	6.1167	40.0272	4.83131
CZ28-21	0.00425216	3.19586	0.019578	0.425604	1.91595	0.478756	12.0947	4.45716	48.1591	15.1624	55.8591	10.4819	90.3882	13.9779
CZ28-22	0.322807	6.02906	0.148072	1.39686	1.86467	2.91638	9.91694	3.71074	38.2258	11.3241	42.6125	8.49322	69.893	11.45
CZ28-24	0.0467901	2.87906	0.0718458	0.60725	1.12105	0.565904	7.14509	3.61546	53.9826	22.0493	98.6075	20.3173	170.745	25.7467
CZ28-25	0.0110105	4.66245	0.0158601	0.643257	1.5048	0.625642	9.87354	2.95699	25.2139	6.51269	20.4008	3.32123	27.1756	4.13593
CZ28-26	0	3.60493	0.028398	1.00211	4.43223	0.844393	30.7047	9.96308	77.2279	14.841	31.7285	3.73135	20.4295	2.31476
CZ28-27	0.00909689	2.90326	0.0393237	0.835294	2.60887	0.581676	20.3034	6.73955	51.1614	10.132	23.7737	3.29373	20.6122	2.51831
CZ28-28	0.0379641	3.32774	0.153194	1.42619	4.60328	0.773311	36.0478	14.5121	150.57	43.9825	140.201	23.0563	172.638	21.3819
CZ28-29	0.361236	5.0572	0.296631	2.86972	1.59111	0.767555	8.78216	3.09786	28.0176	8.32077	28.8824	5.50627	44.3064	6.89989
(d)	La	Ce	Pr	Nd	Sm	Eu	Gd	Tb	Dy	Ho	Er	Tm	Yb	Lu
CZ34-01	0.0426467	3.61315	0.0244159	0.198061	0.792652	0.456492	6.7877	2.5487	31.1851	11.3713	51.5394	11.3324	106.899	19.3121
CZ34-02	0	2.83862	0.00699522	0.378341	1.11249	0.638851	7.24388	2.7572	32.5428	11.796	51.5574	12.9797	138.594	26.4601
CZ34-04	0	11.3106	0.0314593	1.10808	4.42735	0.504549	30.9616	10.7032	99.612	25.4281	73.0841	11.92	84.6158	12.5069
CZ34-05	0.00417379	3.55449	0.0143497	0.291138	1.2209	0.581292	7.63292	2.92532	36.3222	13.1141	58.2737	12.4792	113.499	20.8231
CZ34-06	0.0129213	3.28435	0.0197483	0.37209	1.11306	0.523139	7.79744	2.87875	31.9991	11.0907	44.7126	8.95159	78.4564	13.5573
CZ34-07	0.00420357	3.29034	0.019286	0.237672	0.639728	0.428157	6.21331	2.47693	31.6998	12.5724	59.3914	14.4924	145.081	28.2716
CZ34-08	0.00400617	3.11353	0.0137882	0.426513	1.23508	0.400716	8.23876	3.06996	34.3735	10.8006	40.877	7.77559	62.0118	10.8361
CZ34-09	0	7.70367	0.0246603	0.340582	1.10661	0.363293	8.15139	3.34345	43.3743	17.053	79.7042	19.2888	191.876	36.4378
CZ34-10	0.0125872	3.4477	0.0216702	0.586665	1.726	0.689663	10.0975	3.51345	33.6493	9.62292	31.6734	5.64333	44.5312	6.9167
CZ34-11	0.507221	6.19892	0.181046	1.27752	1.70535	19.0529	9.09741	3.37797	39.2144	13.1383	48.6285	9.3695	78.0424	12.6108
CZ34-12	0.00422069	3.19691	0.014539	0.478055	1.12621	0.530878	7.32979	2.74868	32.8351	11.7465	48.9516	10.6572	100.677	18.8755
CZ34-13	0.00431059	4.87852	0.00990767	0.373843	0.954473	0.420817	6.01612	1.97306	19.2768	4.93383	16.4159	2.89083	23.2789	3.46525
CZ34-14	0	4.84207	0.0272706	0.4174	1.16965	0.458153	8.44345	3.60198	44.6619	16.2376	71.5839	15.8605	146.242	26.4993
CZ34-15	0	3.4117	0.0252069	0.292717	0.946087	0.453504	7.43489	2.71912	31.4268	10.3138	38.3437	6.99316	56.5897	9.11259
CZ34-16	0.267451	10.071	0.23067	1.6818	2.93033	6.12404	20.7277	6.94136	66.0246	17.2989	53.5119	9.05208	66.0927	10.0677
CZ34-17	0	5.70721	0.0250538	0.578728	3.22761	0.475883	24.2412	9.71409	106.337	31.3344	102.043	17.7591	130.399	18.241
CZ34-18	0	3.9776	0.0345802	0.803397	2.82493	0.49789	24.3224	9.83853	95.8549	24.6742	70.612	9.81234	63.4969	7.80248
CZ34-19	0.0104682	3.48159	0.0192817	0.420108	1.55532	0.558079	8.77381	3.36672	40.5954	14.4599	59.6241	12.19	109.504	20.0248
CZ34-20	0.0251397	3.35944	0.0410087	0.560685	1.09144	0.494887	7.92587	3.10648	35.7059	13.008	54.0866	11.4605	98.1934	16.3976
CZ34-21	0.0174236	7.86378	0.0326087	0.495619	1.73604	0.215872	18.1559	7.97115	97.9681	32.7479	116.522	21.2592	163.869	24.943
CZ34-22	0.0517669	12.3855	0.114297	1.38635	5.19298	1.05721	41.0076	12.6798	113.465	28.3459	83.1069	13.0292	99.6266	14.9866
CZ34-23	0.0357749	3.77447	0.06183	0.584019	1.029	0.571726	8.72098	3.00056	36.5722	12.1623	49.3712	9.63856	83.0245	14.3142
CZ34-24	0	9.77428	0.0146619	0.355141	1.43176	0.429127	8.84469	3.15292	36.6609	13.5863	58.6764	12.796	120.533	22.0982
CZ34-25	0	3.3253	0.0124202	0.375617	1.17504	0.440927	8.03187	2.94921	36.9703	12.8738	47.7598	8.60232	65.7552	9.77878
CZ34-26	0.00869245	11.3736	0.0376068	0.889536	4.27683	0.374443	32.1137	10.4975	99.1333	24.7386	71.297	10.9626	79.9756	11.5071
CZ34-27	0.104853	4.83236	0.0781423	1.01177	1.29357	0.493766	7.1969	2.71527	33.7694	13.334	62.1972	15.1367	156.474	30.4823
CZ34-28	0	7.0993	0.0385489	0.79241	3.92288	0.563318	31.9173	12.2594	128.668	37.8225	128.005	21.1191	150.591	20.4584
CZ34-29	0	4.0478	0.0176248	0.351592	1.3093	0.51026	8.34331	3.08055	37.0336	13.782	62.8526	14.9932	150.746	27.8557
CZ34-31	0	15.7784	0.0471025	1.72124	7.01789	0.753017	50.4716	16.0472	134.053	31.0771	85.484	13.4939	96.0124	13.9638
CZ34-32	0.013743	12.9248	0.0476486	1.32531	5.52841	0.616649	44.2727	14.1343	129.818	32.6923	93.8638	14.9125	109.637	16.0848
CZ34-33	0	3.22445	0.0284715	0.467159	1.05364	0.499749	8.29234	2.9971	33.4796	11.2839	46.8986	9.61788	85.4481	14.919
CZ34-34	0.0776263	13.3608	0.0667614	1.02985	3.87617	0.342831	29.2764	11.6983	134.838	41.1849	136.907	23.2158	167.834	24.5522
CZ34-35	0	3.36778	0.020725	0.432084	1.48727	0.543679	8.93088	3.4197	40.8392	14.1838	55.7468	11.0608	98.7478	16.3981
CZ34-36	0.0364635	3.2541	0.0210888	0.337763	1.07361	0.439211	6.19994	2.43166	31.0501	11.702	52.9901	12.1231	111.761	20.3058
CZ34-37	0.0319824	3.07086	0.0290732	0.431056	1.34135	0.462537	8.22449	2.90343	34.5185	12.1099	47.8029	9.661	82.4977	14.4108
CZ34-38	0.00878545	6.78062	0.0355831	0.562629	1.44289	0.733102	6.64877	1.59307	9.9833	1.84927	4.31589	0.573542	4.38143	0.511228
(e)	La	Ce	Pr	Nd	Sm	Eu	Gd	Tb	Dy	Ho	Er	Tm	Yb	Lu
ZZ17-8-01	0.0566271	1.31565	0.120481	1.06336	1.05873	1.42597	3.51854	0.583296	3.21895	0.643337	1.42655	0.186936	1.42824	0.198345
ZZ17-8-02	0.00918896	1.55089	0.0202809	0.44344	1.51403	0.89339	7.25086	1.45397	10.2903	2.33196	6.49193	0.889982	5.37592	1.00501
ZZ17-8-03	0.244266	2.10473	0.559708	5.00589	2.78566	1.3648	6.77522	1.06784	5.86749	0.946576	2.12827	0.253466	1.44238	0.235183
ZZ17-8-04	0.127286	2.42723	0.14865	1.66643	2.059	1.74241	7.5296	1.54128	10.0558	2.26781	6.01359	0.782201	5.63318	0.841181
ZZ17-8-05	2.41729	9.94424	2.04091	13.9832	4.07737	1.86023	9.47038	1.7202	11.7834	2.64128	7.18465	1.12304	6.9976	1.06658
ZZ17-8-06	0.110555	1.16413	0.112161	1.26168	0.725696	0.95185	2.63135	0.510021	3.09132	0.714025	1.758	0.298008	1.76413	0.237231
ZZ17-8-07	0	1.27742	0	0.127542	1.04506	0.523927	4.86774	1.14205	7.70667	1.64961	4.69548	0.650203	4.2705	0.726969
ZZ17-8-08	0.00430156	2.12925	0.0277982	0.725518	2.98041	1.46186	12.7386	2.68585	18.2497	4.19992	11.1962	1.60812	10.5529	1.62729
ZZ17-8-09	0.203634	3.76526	0.585497	6.54534	4.80855	5.52533	8.62056	1.50674	10.668	2.38079	6.85874	0.91401	6.5969	1.13483
ZZ17-8-10	0.0805858	4.0465	0.249974	2.50307	3.1649	2.2347	11.3352	2.3299	17.0147	4.03403	11.5687	1.69958	12.1243	1.98098
ZZ17-8-11	0.0110097	0.638648	0.00836718	0.166075	1.09342	1.16487	5.93921	1.0755	6.812	1.24452	3.3026	0.430925	3.00449	0.453742
ZZ17-8-12	0.00645079	1.73554	0.0228753	0.391078	1.47916	1.05772	8.37764	1.93216	13.3021	3.29457	8.94313	1.28699	8.5154	1.42701
ZZ17-8-13	0.0737542	2.53396	0.157924	1.41754	2.14562	1.35418	9.85607	2.23667	18.2485	4.34635	13.5219	2.14658	16.1409	2.69782
ZZ17-8-14	0	0.261006	0	0.00977723	0.217371	0.237236	1.30048	0.243296	1.42488	0.244205	0.576454	0.0543914	0.527162	0.0555031
ZZ17-8-15	0.0657645	2.85778	0.132206	2.05667	2.97248	3.17008	13.0347	2.59696	18.3238	4.45347	12.5321	1.80618	12.3824	1.98363
ZZ17-8-16	0.210996	1.9331	0.203475	1.82458	1.38937	0.956064	5.27049	0.9892	5.78484	1.16794	3.47294	0.583631	3.92419	0.602036
ZZ17-8-17	0	1.1748	0.00833614	0.294757	1.72985	1.42223	10.4693	2.08079	14.9333	3.10323	8.0197	1.1014	7.15896	1.12205
ZZ17-8-18	0.143444	4.07319	0.296802	2.95164	3.32064	2.44484	9.37442	1.89901	14.5192	3.44308	10.4292	1.5767	9.78358	1.60392
ZZ17-8-19	0.00438857	2.04771	0.0100275	0.383982	1.88112	1.12021	9.74522	2.12241	15.0443	3.32555	9.41067	1.29178	9.54245	1.5361
ZZ17-8-20	7.93385	50.6722	8.76047	63.1449	26.863	7.56027	40.4006	7.53416	52.4477	11.4415	36.1532	5.33748	35.6802	5.75246
ZZ17-8-21	0.0845733	2.87158	0.120337	1.32812	1.13108	0.555227	5.29952	1.14706	9.31815	2.71686	9.6005	1.65078	13.3064	2.56797
ZZ17-8-22	0.0545066	1.98373	0.103313	1.32043	2.59061	2.2647	13.4162	2.82744	20.164	4.37226	11.6325	1.60469	11.0805	1.69529
ZZ17-8-23	0	0.411945	0.00490035	0.0250256	0.295865	0.313304	1.29864	0.279669	1.40183	0.214857	0.422435	0.0513996	0.321533	0.0356349
ZZ17-8-24	0.0538481	0.872442	0.0968855	0.763373	1.94478	0.517336	8.39685	1.58499	8.85749	1.44633	3.39915	0.4147	2.86031	0.396964
ZZ17-8-25	0.00425698	0.514444	0.00486895	0.0477437	0.474851	0.504851	3.30103	0.75534	5.06491	0.930209	2.49351	0.355869	2.35743	0.356169
ZZ17-8-26-C	0.238043	45.7173	0.533161	5.36839	6.4189	2.24422	21.5581	5.00258	45.432	14.4116	58.3399	11.2466	105.436	22.3367
ZZ17-8-27	0.223013	1.45998	0.138303	0.934977	1.50253	0.954469	6.99551	1.57494	12.2834	2.98406	9.44816	1.66979	12.2991	2.77815
ZZ17-8-28	0.0699766	4.99383	0.203906	2.83904	2.56834	0.582494	8.11821	2.40477	27.1884	9.7206	39.4979	7.66303	64.4336	12.7931
ZZ17-8-29	0	1.94744	0.0132768	0.386376	1.21172	0.795918	6.27772	1.3016	8.52176	1.94092	5.07643	0.723416	4.7914	0.732795
ZZ17-8-30-C	0	13.1105	0.0509879	0.989716	2.66433	0.263828	14.718	4.72993	54.6165	20.6209	92.492	18.8774	173.343	35.6732
ZZ17-8-31	1.06936	12.2143	1.9573	15.3408	9.24792	26.7907	18.7584	3.25628	21.0687	4.08074	10.2626	1.30939	7.90828	1.23439
ZZ17-8-32	0.00395545	2.78114	0.0407687	0.714376	2.99136	1.90342	15.0076	3.05912	20.1347	4.55935	11.8724	1.7092	10.3795	1.66629
ZZ17-8-33-C	0.0205746	18.0227	0.10526	1.86098	2.99419	1.02647	11.0999	2.68105	26.1249	9.14035	40.9996	9.06897	90.8047	20.1415
ZZ17-8-34-C	7.12662	102.055	6.3277	49.0404	28.7951	13.9831	42.678	8.00752	78.1599	27.8363	130.235	28.3573	283.264	64.1916
ZZ17-8-35	0	1.14645	0	0.137229	0.492381	0.401528	3.20725	0.749875	5.71639	1.19711	3.73436	0.54797	3.29603	0.589581
ZZ17-8-36	0.611195	9.49563	1.00453	8.18657	5.90088	3.87256	12.8571	2.23722	14.3579	3.43802	9.72173	1.36521	8.49113	1.36191
ZZ17-8-37	0.00193882	1.96345	0.00367927	0.191278	0.872462	0.529007	3.60983	0.842735	6.33131	1.42171	3.99947	0.582895	4.12501	0.629039
ZZ17-8-38	0	2.1218	0.0123037	0.243587	1.2589	0.69023	5.03859	1.06977	6.59555	1.28365	3.13581	0.422342	2.60832	0.365995
(f)	La	Ce	Pr	Nd	Sm	Eu	Gd	Tb	Dy	Ho	Er	Tm	Yb	Lu
ZZ29-2-01	0.107276	3.97646	0.409496	2.70593	1.16712	1.39125	4.05002	1.60232	13.4727	2.7064	7.64847	1.40886	15.9787	4.11111
ZZ29-2-02	0	0.335478	0.0016999	0.115208	0.339679	0.463401	5.12178	2.42219	24.0464	5.35394	13.8985	2.10697	19.063	3.96721
ZZ29-2-03	0.00671744	0.435037	0.0119872	0.220887	0.682829	0.900297	9.90127	4.67233	41.5995	7.98046	18.7131	2.71108	21.5091	4.06687
ZZ29-2-04	0.00227989	0.546139	0.00697543	0.143119	0.777599	0.702687	8.75643	4.40238	39.1536	8.23923	18.7875	2.49177	17.4622	3.06271
ZZ29-2-05	0.00818873	1.49306	0.0120299	0.251737	1.41516	1.00868	16.6161	9.11649	102.436	28.7991	92.0858	16.7339	147.376	31.6739
ZZ29-2-06	0	0.504796	0.00308642	0.140129	0.957972	0.747265	10.1392	5.02747	48.1889	9.91122	21.6019	2.52297	17.4277	3.21573
ZZ29-2-07	0.00445136	0.572238	0.0017036	0.159657	0.861847	0.782379	9.9303	4.27069	38.3147	8.01181	19.1588	2.80491	23.0632	4.68355
ZZ29-2-08	0.0113769	0.512723	0.0557408	0.387645	1.04538	0.798335	9.2265	4.79871	43.9314	8.81407	20.3531	2.93389	23.6696	4.41648
ZZ29-2-09	0.0842519	1.68065	0.0605464	0.646093	1.07566	0.959238	8.86732	4.12042	39.0528	8.17204	20.3248	2.82374	22.5183	4.14373
ZZ29-2-10	0	0.435837	0	0.0714687	0.787387	0.658271	9.60535	4.75489	42.71	8.66809	21.1649	2.98727	24.1973	4.98326
ZZ29-2-11	0.804403	9.17398	1.06749	6.26775	4.05535	3.59213	9.07717	3.16186	26.7029	7.13187	33.3231	8.84557	94.2847	19.6709
ZZ29-2-12	0	0.821363	0.0149882	0.3507	0.997186	0.984355	11.4021	5.72519	57.6543	14.7656	42.5365	6.66913	56.018	12.248
ZZ29-2-13	0	0.647108	0.00687885	0.120696	0.954882	0.705426	8.76432	4.27164	40.7742	9.14195	21.7987	3.10159	24.7877	4.81587
ZZ29-2-14	0.00444735	0.572099	0.00511346	0.229247	0.997036	0.815235	10.4807	5.28353	52.0011	11.9089	31.4001	4.49384	36.9791	7.75939
ZZ29-2-16	0.00873957	0.514712	0.00335047	0.166481	0.664116	0.592805	8.00173	3.71607	35.6292	7.55127	17.461	2.20242	15.9873	2.77753
ZZ29-2-17	0	0.605668	0.00597592	3.00155	0.675464	0.53882	8.07639	3.94538	37.5325	7.77897	17.8601	2.32703	16.783	3.06813
ZZ29-2-18	0.00636573	0.913691	0.00832378	0.218736	1.3004	1.03226	13.927	6.5508	66.7723	15.08	38.3958	5.3179	39.2149	7.68567
ZZ29-2-19	0	0.50789	0.00539549	0.237895	0.723894	0.731027	8.42376	3.70297	38.0442	7.75484	18.3476	2.47685	17.8586	3.59989
ZZ29-2-20	0.00230589	0.430099	0.00176952	0.113673	0.652666	0.520027	6.67167	3.13161	29.2166	6.4512	15.2704	2.16817	17.7562	3.42088
ZZ29-2-21	0	0.280466	0.00423396	0.0796599	0.811714	0.652963	10.9943	5.64072	54.5775	11.398	24.2613	3.13206	22.401	3.77069
ZZ29-2-22	0	0.855243	0.000879415	0.0886664	0.723806	0.592584	7.7727	3.91234	44.4872	12.3774	42.7534	8.21359	82.446	19.7659
ZZ29-2-23	0.011147	0.459868	0.00513465	0.119885	0.733872	0.663237	9.04086	4.37517	41.5817	8.50849	19.8485	2.48315	18.6435	3.30418
ZZ29-2-24	0.00220858	0.56372	0.0152622	0.168247	0.79503	0.702484	8.77678	4.00847	38.5832	8.41821	20.0596	2.68455	21.6835	4.032
ZZ29-2-25	0.0313168	0.865871	0.0395094	0.340803	0.67857	0.63861	7.27991	3.57961	35.012	7.22995	17.7463	2.74076	22.5795	4.23155
ZZ29-2-26	0	0.487739	0.0103377	0.160753	0.771889	0.620344	7.91101	3.86662	36.2759	7.57011	18.3602	2.48139	18.8681	3.57155
ZZ29-2-27	0.00225551	0.592517	0.00866656	0.138313	0.992786	0.816378	11.1758	5.17316	48.4815	10.5382	24.9376	3.19372	23.5896	4.52626
ZZ29-2-28	0	0.680748	0.00508272	0.227156	0.837784	0.882072	12.3111	5.85812	55.9553	11.4611	25.7973	3.03633	20.5915	3.59923
ZZ29-2-29	0.0165094	0.447217	0.0298756	0.212822	0.609804	0.847995	7.42051	3.76201	35.8823	7.29817	17.9329	2.56856	21.5014	4.23684
ZZ29-2-30	0.00442385	0.651783	0.0079697	0.267565	0.863066	0.728703	12.0537	5.86579	56.6046	12.2209	28.3165	3.54169	26.1795	4.67304
ZZ29-2-31	0.183343	2.90708	0.251006	1.22207	1.21657	2.01557	10.2257	4.91409	45.2588	10.2905	24.5701	3.58289	27.3738	5.56762
ZZ29-2-32	0.0329996	0.427899	0.0169183	0.197116	1.06838	1.05451	11.9265	5.26871	46.6367	9.07961	20.651	2.94857	24.7645	4.06093
ZZ29-2-33	0.0164518	0.538613	0.0164667	0.153407	0.721143	0.685757	8.73979	4.18281	42.895	9.01549	20.101	2.56503	18.2603	3.31551
ZZ29-2-34	0.00631036	0.918573	0.00971114	0.169605	1.01402	0.853132	11.1091	6.24106	79.5887	24.1602	94.7699	20.1987	210.779	50.5834
ZZ29-2-35	0.150343	1.73434	0.176855	1.29881	1.32862	0.706881	9.04273	3.82277	37.1568	8.66631	22.9336	3.8035	31.5243	5.87226
ZZ29-2-36	0.00116444	0.731449	0.0134436	0.215156	0.906623	0.877368	10.8665	5.10575	50.5611	11.168	26.6288	3.56892	28.188	5.55748
ZZ29-2-37	0.0106099	0.86862	0.0228698	0.129705	0.98976	0.872763	10.5601	6.01307	69.9631	21.8148	83.1009	16.3956	162.087	36.1985
ZZ29-2-38	0.00761411	0.420501	0.00425434	0.0935358	0.502976	0.552064	6.57102	3.48102	32.8094	6.73086	17.1884	2.78581	25.6448	5.03466
ZZ29-2-39	0.301882	4.00793	0.476618	3.19073	2.54826	1.3746	12.2552	6.0363	76.1247	23.8296	89.0975	17.4565	162.374	33.9729
ZZ29-2-40	0.00877897	0.353444	0.00832577	0.146749	0.633432	0.684171	10.1623	4.75159	46.6938	10.3314	25.3978	3.57588	27.8106	5.49782
ZZ29-2-41	0.00435955	0.573594	0.00826973	0.17126	0.813486	0.878395	10.6275	5.28715	48.2473	10.4056	24.0906	3.00722	21.2617	3.8536
ZZ29-2-42	0.00218511	0.578331	0.00497442	0.0738425	0.67027	0.562493	7.46626	3.70802	38.262	9.49013	26.7984	4.06241	34.8494	7.01669
ZZ29-2-43	0.00220799	0.897687	0.0167565	0.157491	1.10626	1.10125	12.5342	6.42422	72.8098	20.7197	70.8719	13.3531	123.401	28.2907
ZZ29-2-44	0	0.701263	0.00996597	0.165861	1.04057	0.811546	9.81803	4.76016	43.5531	9.29083	21.2887	2.48745	17.4941	3.25573
ZZ29-2-45	0.0192958	0.283282	0.00650944	0.124259	0.449426	0.48279	5.35962	2.75014	24.2904	5.19108	12.5764	1.79729	14.3336	2.80302
ZZ29-2-46	0.00435471	0.68977	0.0115699	0.262101	1.41383	0.919902	12.4835	5.96049	55.1798	12.0527	28.7413	3.54512	26.5614	5.01535
